# Effect of sensor number and location on accelerometry-based vertical ground reaction force estimation during walking

Ricky Pimentel<sup>1</sup>, Cortney Armitano-Lago<sup>2</sup>, Ryan MacPherson<sup>2</sup>, Anoop Sathyan<sup>3</sup>, Jack Twiddy<sup>1</sup>, Kaila Peterson<sup>4</sup>, Michael Daniele<sup>1,4</sup>, Adam W. Kiefer<sup>2</sup>, Edgar Lobaton<sup>4</sup>, Brian Pietrosimone<sup>2</sup>, Jason Franz<sup>1</sup>

<sup>1</sup>Joint Department of Biomedical Engineering, UNC Chapel Hill & North Carolina State University

<sup>2</sup>Department of Exercise & Sport Science, UNC Chapel Hill

<sup>3</sup>Department of Aerospace Engineering, University of Cincinnati, Cincinnati, OH, USA

<sup>4</sup>Department of Electrical and Computer Engineering, North Carolina State University

**Corresponding Author:** Jason Franz, [jrf Franz@email.unc.edu](mailto:jrf Franz@email.unc.edu)

**Keywords:** IMU, gait analysis, machine learning, osteoarthritis, limb loading, biomechanics

## Abstract:

Knee osteoarthritis is a major cause of global disability and is a major cost for the healthcare system. Lower extremity loading is a determinant of knee osteoarthritis onset and progression; however, technology that assists rehabilitative clinicians in optimizing key metrics of lower extremity loading is significantly limited. The peak vertical component of the ground reaction force (vGRF) in the first 50% of stance is highly associated with biological and patient-reported outcomes linked to knee osteoarthritis symptoms. Monitoring and maintaining typical vGRF profiles may support healthy gait biomechanics and joint tissue loading to prevent the onset and progression of knee osteoarthritis. Yet, the optimal number of sensors and sensor placements for predicting accurate vGRF from accelerometry remains unknown. Our goals were to: 1) determine how many sensors and what sensor locations yielded the most accurate vGRF loading peak estimates during walking; and 2) characterize how prescribing different loading conditions affected vGRF loading peak estimates.

We asked 20 young adult participants to wear 5 accelerometers on their waist, shanks, and feet and walk on a force-instrumented treadmill during control and targeted biofeedback conditions prompting 5% underloading and overloading vGRFs. We trained and tested machine learning models to estimate vGRF from the various sensor accelerometer inputs and identified which combinations were most accurate.

We found that a neural network using one accelerometer at the waist yielded the most accurate loading peak vGRF estimates during walking, with errors around 4.3% body weight. The waist-only configuration was able to distinguish between control and overloading conditions prescribed using biofeedback, matching measured vGRF outcomes. Including foot or shank acceleration signals in the model reduced accuracy, particularly for the overloading condition. Our results suggest that a system designed to monitor changes in walking vGRF or to deploy targeted biofeedback may only need a single accelerometer located at the waist.

## Introduction

Osteoarthritis (OA) is the 10<sup>th</sup> leading cause of global disability, with approximately 10% of adults in the United States exhibiting OA.(1) In addition to substantial physical burden, management of OA exacts a considerable financial burden on our healthcare system.(2) As of 2019 in the United States, OA annually costs approximately \$360 billion in direct costs and \$550 billion in all-cause total costs.(1) Although OA risk increases with age, the consequences of OA are not limited to older adults. Individuals who sustain lower hip, knee, or ankle joint injuries are at much higher risk for developing OA early in life.(3) Considerable effort and investment has led to surgical and rehabilitative interventions to prevent the development and slow the progression of OA. Aberrant loading is a key determinant of OA onset and progression.(2–8) Unfortunately, most interventions are not specifically designed to optimize loading of lower extremity joints, which is critical to maintaining healthy joint tissues.(9–11)

Healthy gait biomechanics distribute and balance forces across lower extremity joint surfaces to preserve joint function and tissue health.(12,13) Joint injury and surgery are accompanied by pain, swelling, and muscle weakness which causes individuals to adopt atypical patterns of force distribution across lower extremity joints well after being discharged from formal physical therapy that seeks to correct these impairments.(14–16) Although such gait adaptations may allow individuals to maintain function following injury and surgery, joint tissues break down quickly in response to atypical and unbalanced joint forces.(3,5,7,8) Therefore, it is critical to maintain characteristically healthy gait biomechanics and joint tissue loading to prevent the development and/or progression of lower extremity OA.

Fortunately, limb-level biomechanical outcomes are linked to joint tissue and symptom-level changes linked to OA onset and progression.(8,17–20) Specifically, lower first peak vertical ground reaction force (vGRF), in particular, associates with more deleterious biological joint tissue changes and worse patient-reported outcomes that are consistent with knee osteoarthritis development. (8,17–20) Altering peak vGRF magnitudes via real-time biofeedback may normalize limb-level gait biomechanics(21) and limit the biological changes leading to OA development. However, personalized prescription of joint loading cannot be feasibly implemented in the clinical management of patients with OA because of the expensive and often immobile force-sensing equipment required. Thus, there is a critical need for inexpensive and portable systems that can monitor and prescribe evidence-based changes to critical variable of limb-level loading for the purpose of mitigating OA onset and progression.

Cost-effective wearable sensor solutions may provide a clinically-feasible option to monitor limb loading. For example, accelerometers and inertial measurement units have been used to estimate vGRFs during walking. Veras et al. (2022) found that a hip-worn accelerometer narrowly outperformed other accelerometers (distal shank, lower back) in estimating vGRF loading peak during walking (hip:  $R^2 > 0.96$ , mean absolute percentage error  $< 7.3\%$ ).(22) Similarly, Alcantara et al. (2021) estimated loading peak vGRFs during running using a sacral accelerometer within a mean absolute error (MAE) of 4.3 %BW (percent body weight) using a quantile regression forest model and of 4.0 %BW using a linear regression model.(23) Even more researchers have used accelerometers below the waist to estimate vGRF. Jiang et al. (2020) found a shank accelerometer to be the single best estimator of vGRF (within an root mean square error of 2%) compared to other sensors on the foot, distal thigh, and proximal thigh. However, those authors did not include comparisons to a waist- or hip-worn sensor.(24) Bach et al. (2022) used only shank accelerometers to estimate vGRF profiles with  $R^2 = 0.97$  and a normalized root mean square error of 5.2%.(25) Altogether, these studies highlight that various accelerometer numbers and locations can be used to estimate vGRF. However, none of these studies actively prescribed vGRF changes to determine veracity in predicting effects of loading interventions or to drive those interventions directly.

Based on the available literature, researchers and clinicians seeking to estimate walking vGRF via accelerometry may be confused regarding where to place sensors and how many are needed for accurate outcomes. Thus, our first goal was to determine how many sensors and which locations yielded the most accurate vGRF loading peak estimates. Those individuals may also wonder whether wearable devices can reliably detect changes in loading profiles during walking. Accordingly, our second goal was to characterize how different loading conditions prescribed using biofeedback affect vGRF loading peak estimates. Ultimately, this is an important step in developing wearable sensor and biofeedback systems that can be deployed in real-world environments to detect, monitor, and treat aberrant forces associated with lower extremity OA.

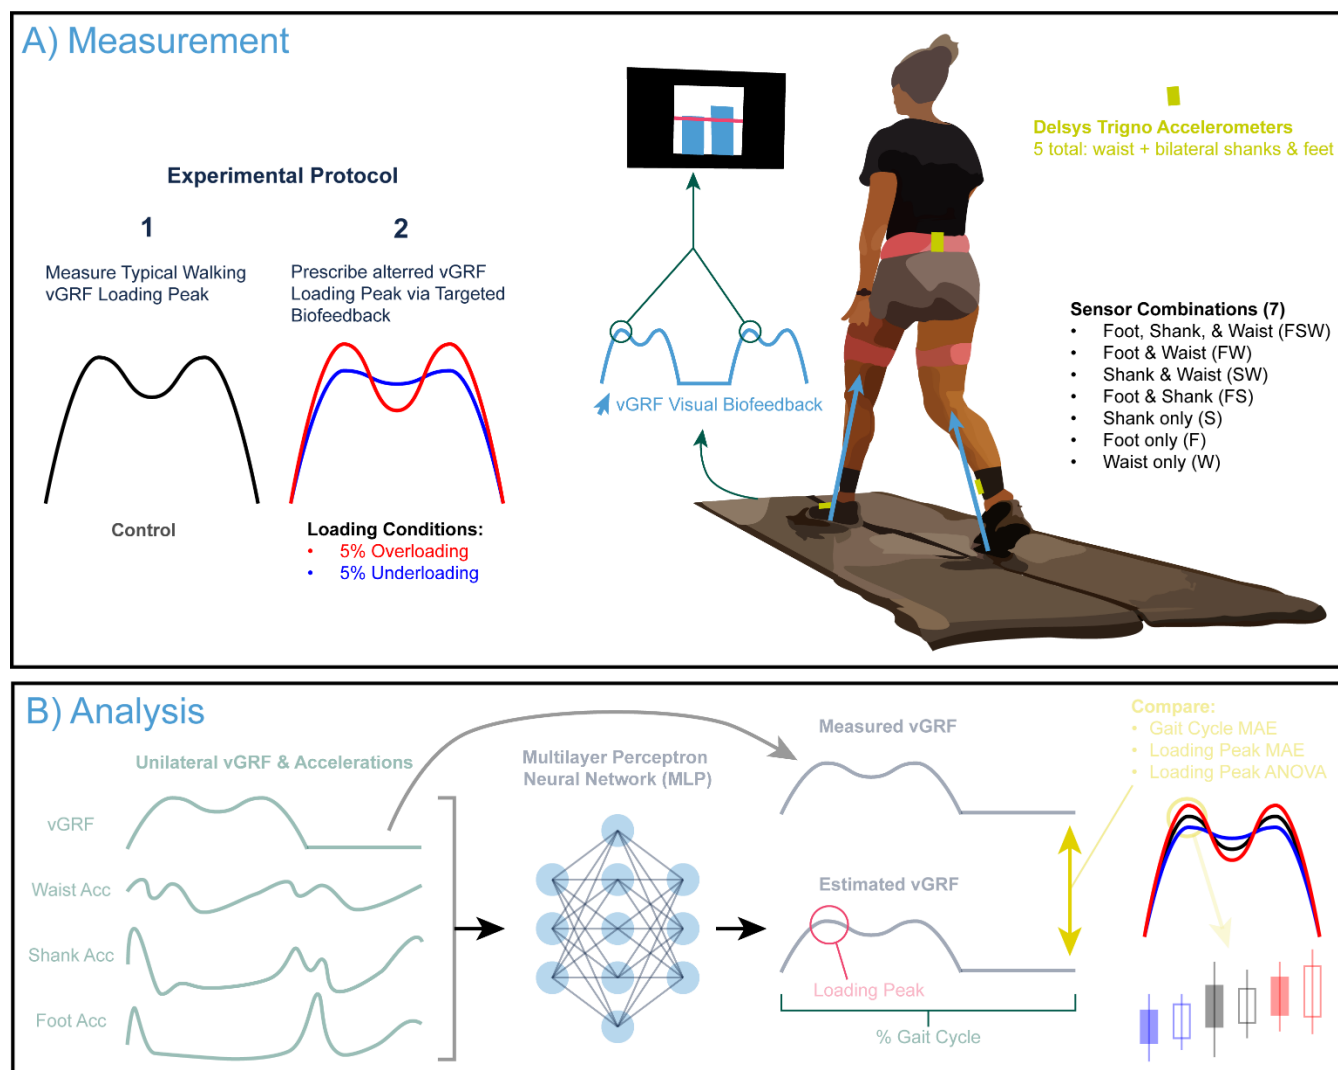

**Figure 1:** A) We recorded ground reaction forces and lower body accelerations during typical walking and prescribed changes using vGRF targeted biofeedback displaying the loading peak on a screen in front of the participant. B) For analysis, we trained a series of MultiLayer Perceptron models to estimate the unilateral vertical ground reaction force (vGRF) across the gait cycle based on acceleration inputs from various sensor combinations that included waist, shank, and foot sensors. All trained models unilaterally estimated vGRF, only including sensors on that specific side (i.e., left vGRF from the waist, left shank, and left foot).

## Materials and Methods

### Participants, Equipment, & Experimental Design

We recruited a cohort of 20 (10 male, 10 female) healthy young adults to participate in this study (age:  $24.7 \pm 5.18$  years, height:  $1.77 \pm 0.11$  m, mass:  $75.6 \pm 13.7$  kg, typical walking speed:  $1.41 \pm 0.09$  m/s). We excluded any prospective participants who: were younger than 18 or older than 35 years of age; had a history of congenital or acquired cognitive, ophthalmologic, or neurological disorders; had a history of chronic peripheral or central vestibular disorders; began anti-seizure medication for any reason within two months of participation; had a BMI equal to or greater than 36; or used an assistive device and/or orthotics to walk. We measured participants' habitual overground walking speed via four passes along a 10-m walkway. We used Delsys Trigno (Natick, MA, USA) sensors to collect bilateral three-dimensional acceleration from the dorsum of each foot, the anterior/medial bony surface of the distal shank, and posteriorly on the waist.

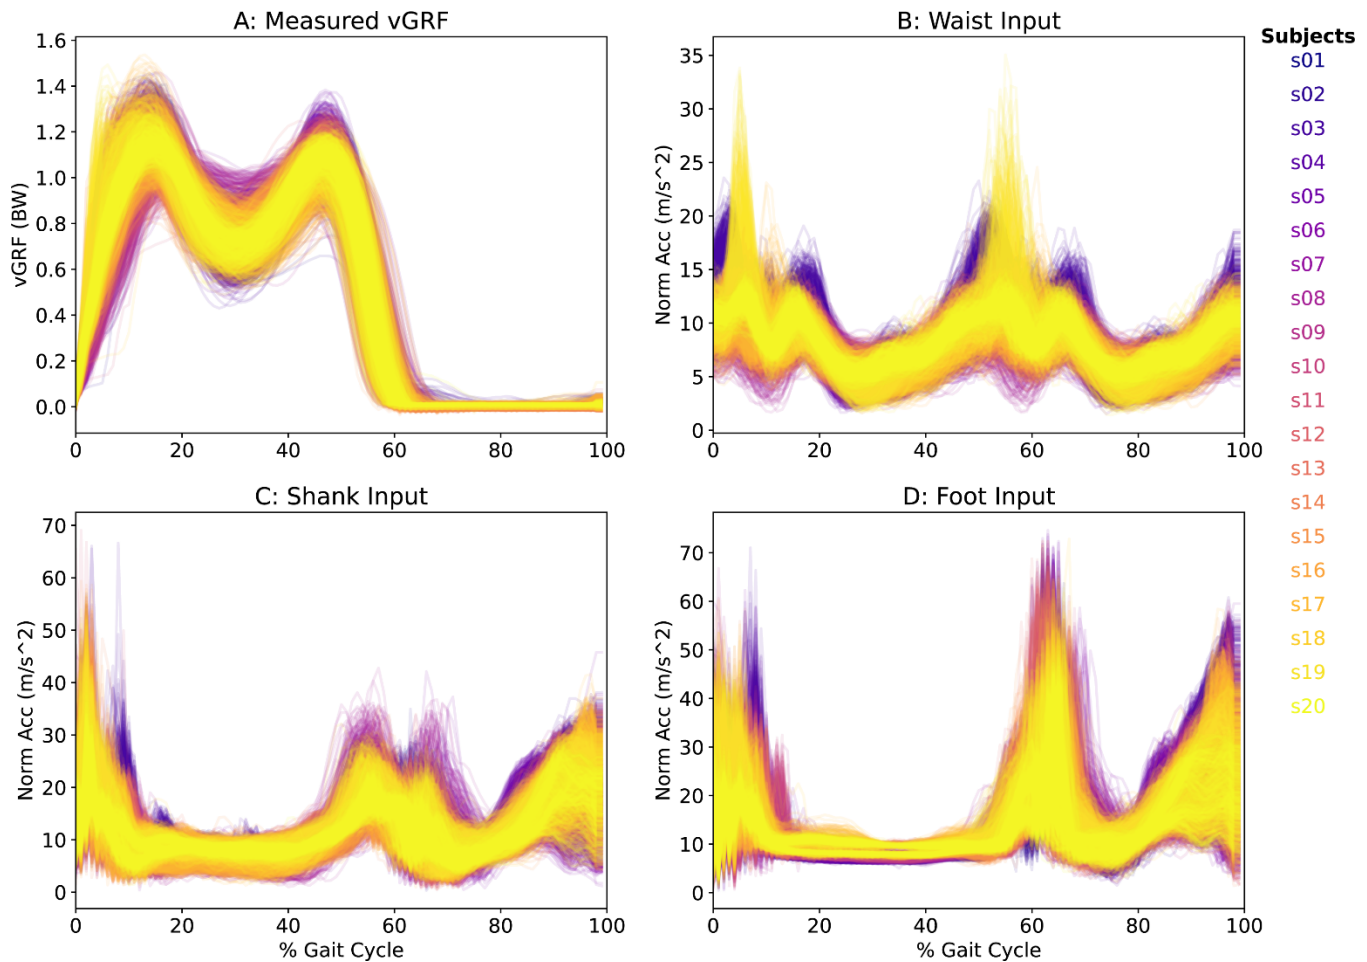

**Figure 2:** Here we show the target vGRF signal (A) and input vector magnitude acceleration waveforms (B-D) used to estimate vGRF for 100 steps (50 left, 50 right) for all subjects (separated by color).

Participants walked at their typical overground speed on a force-instrumented treadmill (Bertec, Columbus, OH, USA) for five minutes (control condition, Figure 1A). We recorded synchronized acceleration (2000 Hz) and GRF data (1200 Hz) via Qualisys Track Manager (Qualisys, Gothenburg, Sweden). During the third minute of this control condition, we also recorded vGRF profiles using custom Matlab (Mathworks, Natick, MA, USA) scripts(26) to use in subsequent trials with targeted biofeedback (Figure 1A). Specifically, participants performed two additional five-minute walking trials while responding to real-time biofeedback designed to prescribe, in randomized order, 5% higher and 5% lower loading peak vGRF (overloading and underloading, respectively) during the first 50% of the stance phase (Figure 1A). Participants viewed a screen showing two bar plots, representing their left and right vGRF loading peak, updated in real time as the average from the two previous steps (Figure 1A). The  $\pm 5\%$  target values for these loading conditions were based on the side-specific averages measured during the control condition and were designed to emulate different lower extremity loading phenotypes. To facilitate synchronization, we asked participants to stomp on each force plate with their left and right foot in succession prior to starting or stopping the recorded data. The pre/post-trial stomp provided a sufficient timestamp via a high magnitude signal for a reliable cross correlation analysis.

### *Data Reduction & Model Descriptions*

Out of the 60 total trials recorded, two trials needed to be manually adjusted due to a timing error between the acceleration and force data. For these two trials, we synchronized the acceleration and force data by identifying the relative lag using a cross-correlation function and truncating or appending empty frames to the acceleration signal, keeping the force signal constant.

We extracted the first 50 valid left and right strides for a total of 100 strides per walking condition. We resampled acceleration and GRF signals to 100 Hz in post processing. For consistency across both vGRF and acceleration signals, we extracted gait cycles using a peak-finding algorithm on body weight (BW) normalized force data, identifying stance phases with a minimum height of 0.95 BW, a minimum prominence of 0.8 BW, a minimum width of 0.15 s, and a minimum distance of 0.5 s between peaks. We selected these identification parameters based on manual observation across the entire dataset (all subjects and biofeedback conditions).

We extracted accelerometer signals in time series for foot, shank, and waist with time-matched vGRF data and resampled each stride to 100 data points (Figure 1B). We calculated 3D acceleration vector magnitudes (via Euclidian normalization) to remove any bias of sensor orientation and sidedness. Figure 2 shows the measured vGRF and acceleration data for all input steps.

We tested seven different sensor combinations by altering the number and location of accelerometers used as model inputs, as displayed in Figure 1A. Each model included steps across all loading conditions (control/under/over). We trained Multi-Layer Perceptron regressor models from the Sci-Kit Learn(27), with a convergence max iteration of 500, logistic activation functions, and a single hidden layer (size = 200 neurons) based on preliminary parameter tuning. To benchmark model accuracies, we performed 5-fold cross validation, splitting the training and testing steps on an 80:20% (16:4 subjects) ratio in a subject leave-out approach. In line with common k-fold cross validation practices, we changed which 20% the model was tested on for each k-fold iteration.

### *Statistical Comparisons*

We quantified accuracy via mean absolute error (MAE) between measured and predicted vGRF both across the entire gait cycle (GC) and at the loading peak. We characterized the ability to distinguish between loading conditions by performing two-way repeated measures ANOVA using each of the three most-accurate models, testing for main effects of mode (measured vs estimated), condition (under, control, & over-loading), and for interaction effects (mode x condition). We also ran one-way repeated measures ANOVA across the MAE estimates across the GC and at the loading peak. When a significant main effect was found, Tukey's post-hoc tests identified significant pairwise differences between measurement modes and across loading conditions. We report effect sizes for ANOVAs as partial eta squared ( $\eta_p^2$ ) and post-hoc analyses using eta squared ( $\eta^2$ ).

## **Results**

### *Benchmarking Accuracy Across Sensor Configurations*

Figure 3 shows all measured and predicted vGRFs for all steps in the testing set across each configuration (panels) and k-fold iteration (colors). Qualitatively, all sensor configurations yielded model predictions that reflected the double-hump shape of vGRF across the gait cycle. Compared to other models, the Waist model (Fig. 3H) appeared to best reflect the variability of measured vGRFs across participants and conditions (Fig. 3A).

Figure 4 shows MAE between measured and estimated vGRFs over the gait cycle (A) and at the instant of the loading peak (B) for each sensor configuration (x-axis) and k-fold iteration (colors). The model driven exclusively by Waist accelerations outperformed all other models (GC MAE: 4.0 %BW, loading peak MAE: 4.3 %BW). The Foot-Waist configuration performed second best (GC MAE: 4.3 %BW, loading peak MAE: 4.9 %BW) followed by the Shank-Waist configuration (GC MAE: 4.5 %BW, loading peak MAE: 5.2 %BW). All other sensor configurations produced estimates with higher than these reported MAE values, and generally above 5 %BW.

### *Model-Predictions of Altered Lower-Extremity Loading*

Compared to the control condition, the measured and average estimated vGRF loading peaks increased and decreased consistently with the biofeedback target values (condition main effect:  $p < 0.001$ ,  $\eta_p^2 = 0.719$ ). Compared to the control condition, the measured vGRF loading peaks significantly differed only for the overloading condition (Tukey's:  $p = 0.009$ ,  $\eta^2 = 0.177$ , Fig. 5C,G,K).

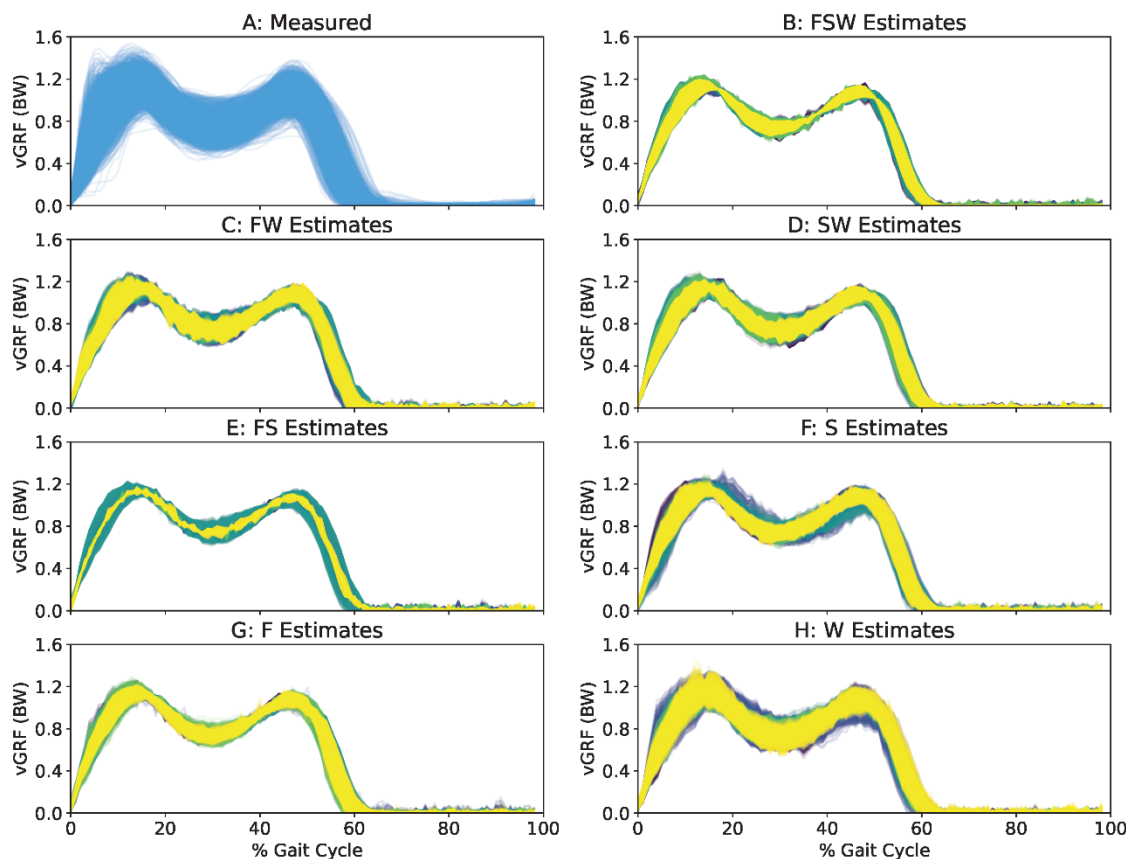

**Figure 3:** For qualitative comparison convenience, we show the measured vGRF signal (A) and all model estimates (B-H) for all steps across each k-fold validation (color). All models successfully estimated the double-humped vGRF profile across the gait cycle. The Waist model seemed to best reflect the true variability of the original signal.

The Waist model successfully distinguished between overloading and control vGRF loading peaks (condition:  $p < 0.001$ ,  $\eta_p^2 = 0.719$ ) and yielded values that were indistinguishable from those measured (mode:  $p = 0.160$ ,  $\eta_p^2 = 0.101$ , Fig. 5C). Waist model MAEs did not significantly change between conditions across the gait cycle (condition:  $p = 0.368$ ,  $\eta_p^2 = 0.051$ , Fig. 5B) nor at the loading peak (condition:  $p = 0.222$ ,  $\eta_p^2 = 0.076$ , Fig. 5D).

Compared to the control condition, the Foot-Waist model (condition:  $p < 0.001$ ,  $\eta_p^2 = 0.722$ ) did not distinguish loading peaks for overloading ( $p = 0.092$ ,  $\eta^2 = 0.107$ ), but did yield a significant difference for underloading ( $p = 0.026$ ,  $\eta^2 = 0.149$ , Fig. 5G). Compared to measured values, the Foot-Waist model yielded a different loading peak vGRF for overloading ( $p = 0.023$ ,  $\eta^2 = 0.124$ , Fig. 5G) but not underloading ( $p > 0.533$ ,  $\eta^2 < 0.010$ ). The Foot-Waist model also yielded similar estimates of the vGRF across the gait cycle (condition:  $p = 0.386$ ,  $\eta_p^2 = 0.049$ , Fig. 5F). Conversely, Foot-Waist model accuracy at the loading peak varied across conditions (condition:  $p < 0.001$ ,  $\eta_p^2 = 0.362$ , Fig. 5H) with overloading error significantly higher than for underloading and control conditions ( $p \leq 0.001$ ,  $\eta_p^2 \geq 0.224$ ).

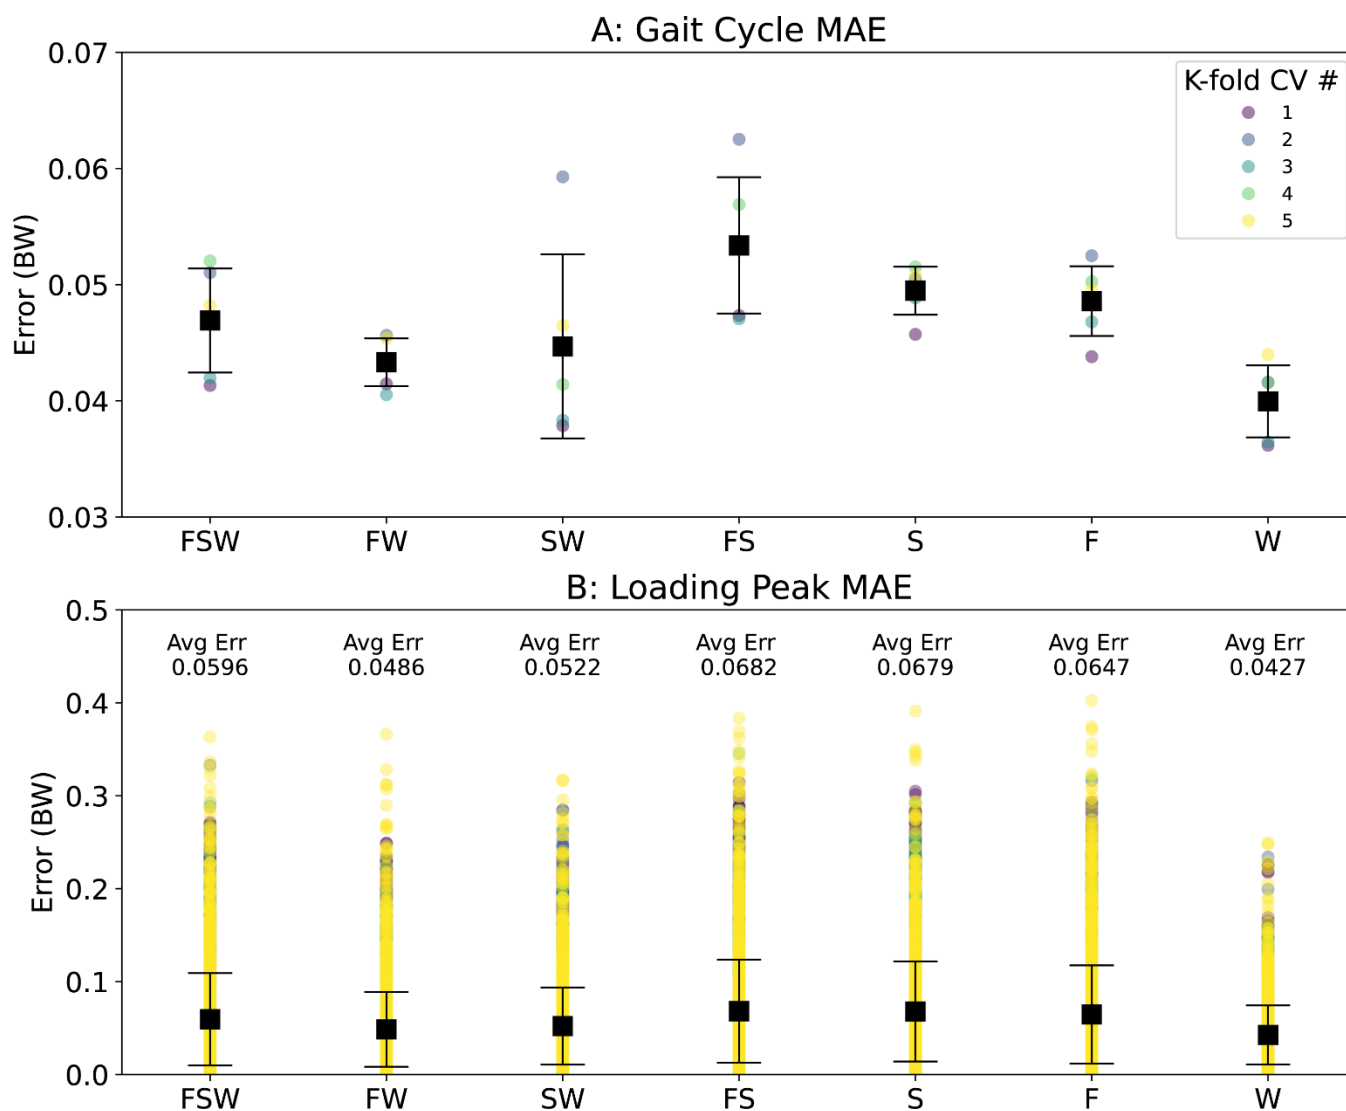

**Figure 4:** Model accuracy varied across each of the sensor combinations yet was relatively stable across each k-fold iteration. The Waist sensor configuration yielded the most accurate model on average for both the gait cycle MAE (A) and loading peak MAE (B). The Foot-Waist model was 2nd best, and Shank-Waist model 3rd best across both outcomes.

The Shank-Waist model (condition:  $p < 0.001$ ,  $\eta_p^2 = 0.708$ ) was unable to distinguish between loading conditions ( $p > 0.064$ ,  $\eta^2 = 0.138$ , Fig. 5K). Additionally, the Shank-Waist model estimates were different from the measured vGRF loading peaks (mode:  $p = 0.025$ ,  $\eta^2 = 0.239$ ), with the overloading condition estimates different from measured values ( $p = 0.009$ ,  $\eta^2 = 0.161$ , Fig. 5K). The Shank-Waist model yielded estimates with consistent errors between conditions across the gait cycle (condition:  $p = 0.205$ ,  $\eta_p^2 = 0.080$ , Fig. 5J). However, the Shank-Waist model errors at the loading peak varied between conditions (condition:  $p < 0.001$ ,  $\eta_p^2 = 0.411$ , Fig. 5L) with overloading error significantly higher than underloading and control conditions ( $p \leq 0.002$ ,  $\eta^2 \geq 0.163$ ).

### Seeking Interpretability

Figure 6 attempts to explore characteristics of the neural-network prediction model for the Waist-only sensor configuration. The estimated vGRF (horizontal axis and top sub-axis) received strong positive weights during early (5-15% GC) and late (50-60% GC) stance phase, as well as strong negative weights during leg swing (60-100% GC). Although the vGRF weights during midstance (15-50% GC) included both positive and negative values, those weights were relatively smaller. Model weights for the input Waist acceleration vectors (vertical axis and right sub-axis) were more complicated. However, we tended to see more positive weights during the stance phase (0-50% GC) and more negative weights during the swing phase (60-100% GC).

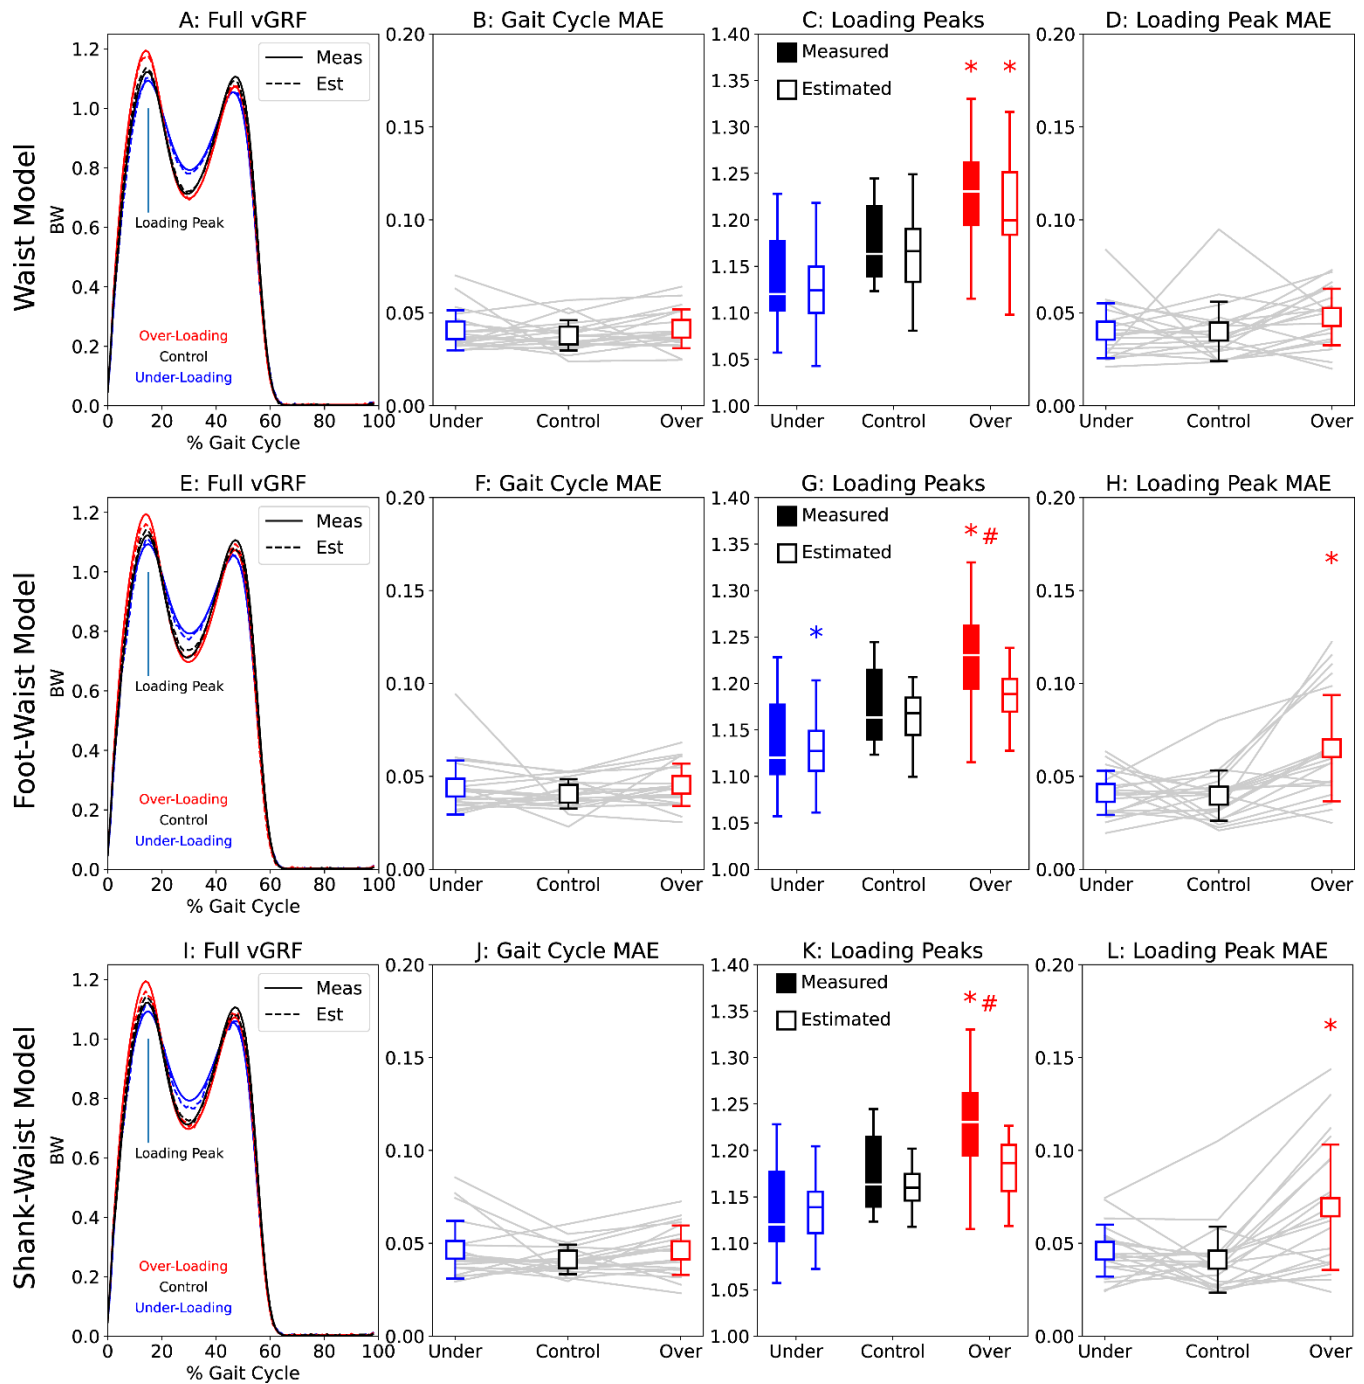

**Figure 5:** We further explore the 3 most accurate sensor configurations, analyzing the Waist (A-D), Shank-Waist (E-H), and Foot-Waist (I-L) models across each of the loading conditions (underloading=blue, control=black, overloading=red). Asterisks indicate a significant difference from the control condition for that measurement type, whereas hashes (#) represent a significant difference between measurement modalities (true vs estimated).

## Discussion

Our goals were to: 1) determine how many sensors and what sensor placement and locations yielded the most accurate vGRF loading peak estimates during walking; and 2) characterize how prescribing different loading conditions affected vGRF loading peak estimates. We found that a neural network using one waist-mounted accelerometer yielded the most accurate loading peak vGRF estimates during walking, with errors around 4.3% BW. Furthermore, this waist-only configuration was able to distinguish between control and overloading conditions prescribed using biofeedback, matching measured vGRF outcomes. Including foot or shank acceleration signals in the model reduced accuracy, particularly for the overloading condition. Our results suggest that a system designed



to monitor changes in walking vGRF or to deploy targeted biofeedback may only need a single accelerometer located at the waist.

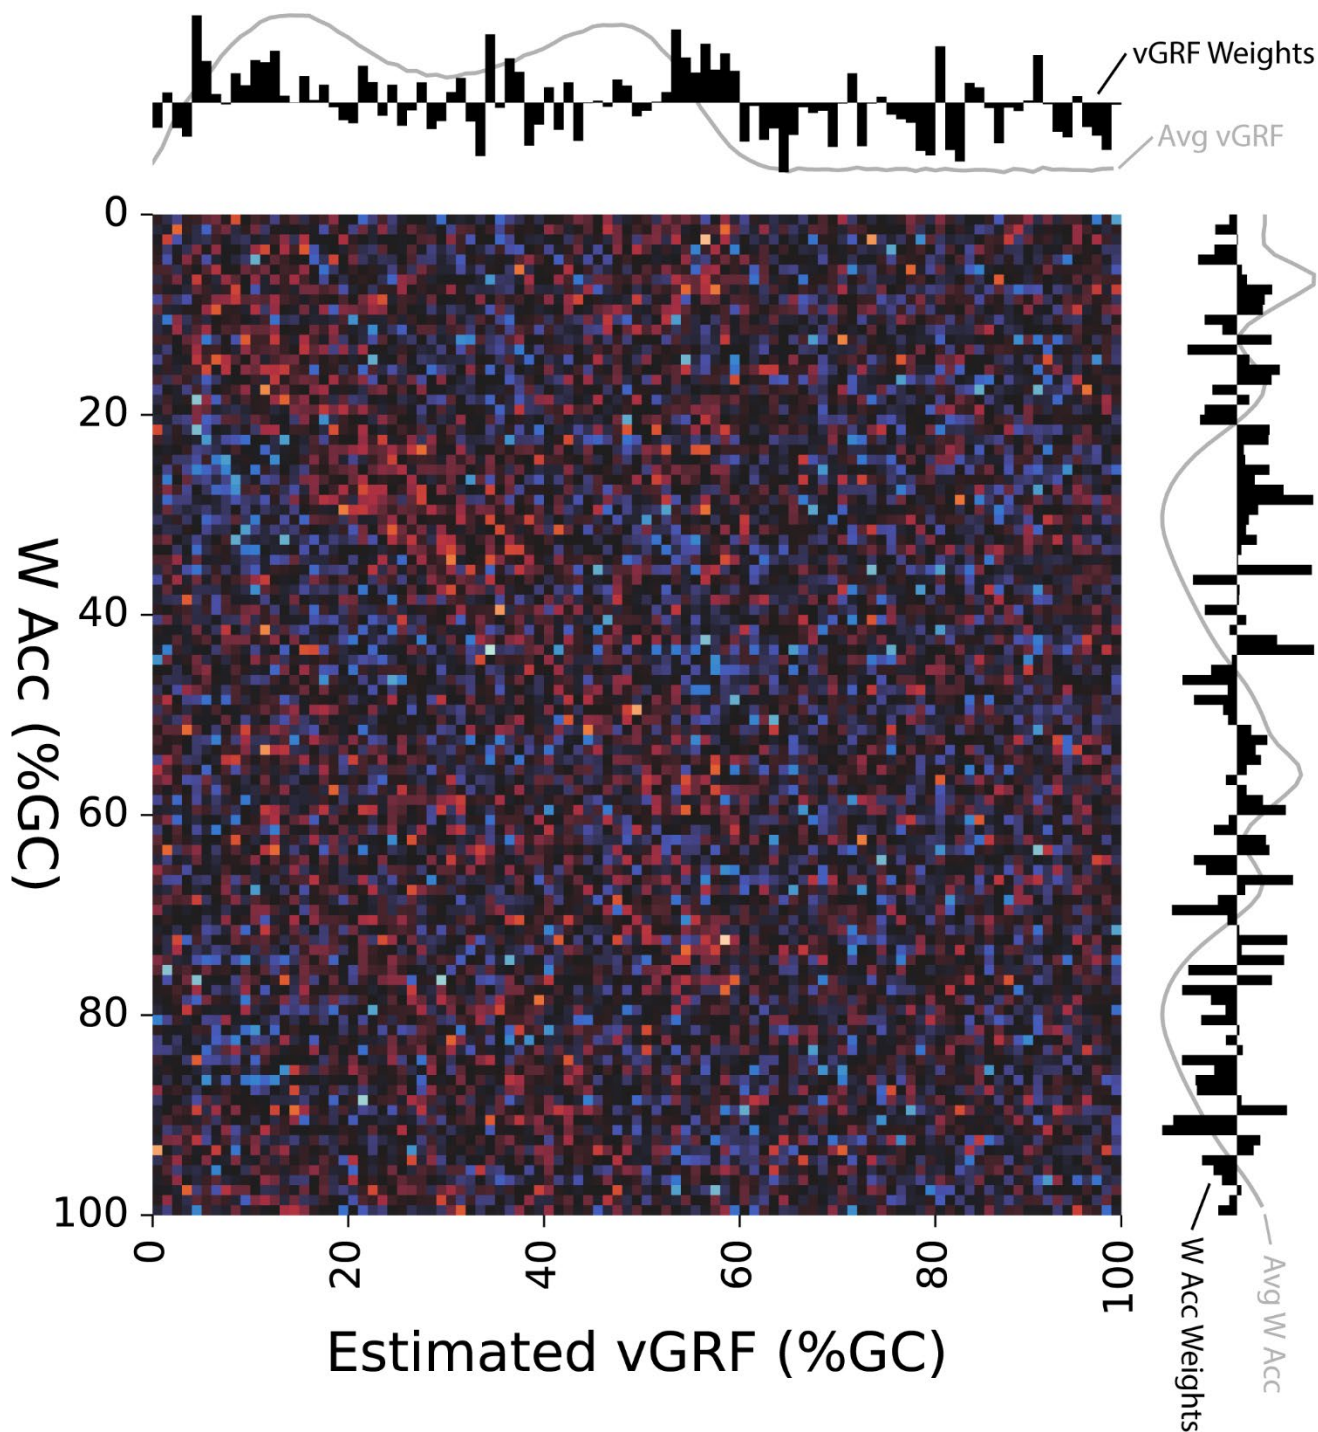

**Figure 6:** To address interpretability of the Waist model, we show the resultant model weights for the input (vertical axis) and output (horizontal axis) layers of our multilayer perceptron neural network model. Model weights are shown via heatmap across their respective time series (along each axis top to bottom and left to right), with higher positive weights in red, lower negative weights in blue, and zero weights in black. Along each sub-axis, we also show the mean-normalized summed weights for each column/row as a bar graph, with higher relative weights shown above or to the right of the axes. For additional context, we also overlay the average input Waist vector magnitude acceleration signal along the vertical sub-axis and the average estimated vGRF signal along the horizontal sub-axis, both shown in gray.

The novelty in our scientific contributions is twofold. First, we systematically compared model-prediction accuracies across multiple sensor configurations. Previous studies designed to predict walking vGRF values from wearable sensors have generally quantified model accuracies based on a single accelerometer placed at, for example, the feet versus shank or waist. By using multiple combinations of sensors, we see the effects of how the various sensor locations affect vGRF estimates (Fig. 2). A second innovation comes from our characterization of accelerometers to detect changes in vGRF across multiple loading phenotypes, prescribed herein using real-time biofeedback. As one clinical application, vGRF profiles during walking are indicative of patient-reported and biological outcomes among individuals during recovery from anterior cruciate ligament (ACL) reconstruction.(19,20) Thus, this study suggests that wearable sensors can be used to detect and monitor vGRF changes between overloading and typical walking, which could help improve clinical outcomes during rehabilitation.

Generally, our measured vGRFs were able to differentiate between control and overloading conditions and the Waist model replicated those findings. Interestingly, the Foot-Waist model detected a significant difference between underloading peak vGRF and the control condition that was not detected using the measured vGRF signals (Fig. 5G). Although loading peaks did decrease on average during the underloading condition, no other model or measurement mode detected a significant difference from the control vGRF. Loading peak errors were also higher on average during the underloading condition (Fig. 5H), which may have contributed to this unanticipated finding. In combination with inaccuracy during overloading, we suggest that the Foot-Waist configuration is unlikely to yield accurate vGRF loading peak estimates across biofeedback conditions.

Our Waist model aligns with other groups that have used machine learning or regression equations to estimate vGRF loading peak during walking or running.(22,23) Although lower leg sensor sites can accurately estimate vGRF signals under different scenarios,(24,25) we found that accelerometers placed near the body's center of mass may provide optimal features to estimate vGRF during walking. This outcome is theoretically supported by simple Newtonian physics-based models of walking(21), in that acceleration of the body's center of mass is proportional to the net external force acting on the body. While the other lower-limb sensors may contain salient features that can accurately estimate vGRF, we contend that sensor locations that track center of mass acceleration are more reliable and accurate.

We chose an accelerometer-based solution for vGRF estimation because of their low cost and simplicity, both of which are beneficial to delivering options for estimating vGRF outside of the research laboratory. Compared to other potential solutions (pressure-sensing insoles, instrumented walkways), accelerometers and inertial measurement units are adaptable across patients of any size, simple to change between patients, and can be applied to a wide variety of outpatient environments. Unlike previous studies, we used the acceleration vector magnitude in our model, combining the 3-dimensional components into one composite acceleration measure. This processing strategy simplifies sensor placement orientation, is agnostic to left/right sidedness, and reduces data processing complexity which should enable high-throughput assessment.

As scientists, engineers, and clinicians increasingly utilize machine learning models to estimate biomechanical parameters, interpretation of the data produced by these models remains a challenge for successful utilization of model-based techniques.(28) We assessed the interpretability of our most accurate model by mapping the input and output weights from the neural network multilayer perceptron model (Fig. 6). We found that model weights tended to align with notable events from the gait cycle, including stance and swing phase as well as local maximums in the vGRF signal during early and late stance. Our interpretability plot reveals some of the underlying features that our model may use to estimate the vGRF waveform. By calculating and displaying our model weights, we aim to work toward a better understanding of how machine learning models make predictions, and what input features are most influential, with the hope of understanding and explaining model estimates.

### *Limitations*

One limitation is that this study only includes young, healthy participants. Thus, our models may not extend to individuals expressing pathologic gait or who may be at risk for developing OA. Another limitation is that our input data only included acceleration signals, lacking the gyroscope and magnetometer signals common to inertial measurement units. Although accelerometers likely contain the most relevant features for vGRF estimation, it is possible that the other signals may contain salient features that could aid in vGRF estimation and perhaps help distinguish between loading conditions.

## **Conclusion**

We can accurately estimate the vGRF loading peak within 5% of body weight and distinguish between biofeedback-induced loading conditions using only a waist accelerometer by implementing a multilayer perceptron neural network model. However, other lower-body segment accelerations may be helpful in other ways, identifying gait events which are necessary to parse gait cycles from the acceleration signal stream. We suggest that a wearable sensor system comprised of a single waist sensor is not only sufficient, but optimal for implementing a biofeedback-based therapy system to prescribe limb loading during gait retraining.

## **Acknowledgements**

We thank the UNC Chapel Hill Eshelman Institute for Innovation for funding this study. The funders had no role in study design, data collection and analysis, decision to publish, or preparation of the manuscript.

## **Conflicts of Interests.**

Jason Franz and Brian Pietrosimone are founders and Chief Technology Officer and President, respectively, of VETTA Solutions, Inc, a start-up company with prospective product solutions in the areas of wearable sensor solutions for musculoskeletal health applications. The conceptualization of this study and all data collections and analyses were completed prior to the incorporation date of the company.

## References

1. Lo J, Chan L, Flynn S. A Systematic Review of the Incidence, Prevalence, Costs, and Activity and Work Limitations of Amputation, Osteoarthritis, Rheumatoid Arthritis, Back Pain, Multiple Sclerosis, Spinal Cord Injury, Stroke, and Traumatic Brain Injury in the United States: A 2019 Update. *Arch Phys Med Rehabil*. 2021 Jan 1;102(1):115–31.
2. Wellsandt E, Gardinier ES, Manal K, Axe MJ, Buchanan TS, Snyder-Mackler L. Decreased Knee Joint Loading Associated With Early Knee Osteoarthritis After Anterior Cruciate Ligament Injury. *Am J Sports Med*. 2016 Jan 1;44(1):143–51.
3. Kumar D, Su F, Wu D, Padoia V, Heitkamp L, Ma CB, et al. Frontal Plane Knee Mechanics and Early Cartilage Degeneration in People With Anterior Cruciate Ligament Reconstruction: A Longitudinal Study. *Am J Sports Med*. 2018 Feb;46(2):378–87.
4. Astephen JL, Deluzio KJ, Caldwell GE, Dunbar MJ, Hubley-Kozey CL. Gait and neuromuscular pattern changes are associated with differences in knee osteoarthritis severity levels. *J Biomech*. 2008 Jan 1;41(4):868–76.
5. Kumar D, Kothari A, Souza RB, Wu S, Benjamin Ma C, Li X. Frontal plane knee mechanics and medial cartilage MR relaxation times in individuals with ACL reconstruction: A pilot study. *The Knee*. 2014 Oct 1;21(5):881–5.
6. Palmieri-Smith RM, Thomas AC. A Neuromuscular Mechanism of Posttraumatic Osteoarthritis Associated with ACL Injury. *Exerc Sport Sci Rev*. 2009 Jul;37(3):147.
7. Pfeiffer SJ, Spang J, Nissman D, Lalush D, Wallace K, Harkey MS, et al. Gait Mechanics and T1ρ MRI of Tibiofemoral Cartilage 6 Months after ACL Reconstruction. *Med Sci Sports Exerc*. 2019;51(4):630–9.
8. Pietrosimone B, Loeser RF, Blackburn JT, Padua DA, Harkey MS, Stanley LE, et al. Biochemical markers of cartilage metabolism are associated with walking biomechanics 6-months following anterior cruciate ligament reconstruction. *J Orthop Res*. 2017;35(10):2288–97.
9. Felson DT. Osteoarthritis as a disease of mechanics. *Osteoarthritis Cartilage*. 2013 Jan 1;21(1):10–5.
10. Du G, Zhan H, Ding D, Wang S, Wei X, Wei F, et al. Abnormal Mechanical Loading Induces Cartilage Degeneration by Accelerating Meniscus Hypertrophy and Mineralization After ACL Injuries In Vivo. *Am J Sports Med*. 2016 Mar;44(3):652–63.
11. Radin EL, Martin RB, Burr DB, Caterson B, Boyd RD, Goodwin C. Effects of mechanical loading on the tissues of the rabbit knee. *J Orthop Res*. 1984;2(3):221–34.
12. Andriacchi TP, Koo S, Scanlan SF. Gait Mechanics Influence Healthy Cartilage Morphology and Osteoarthritis of the Knee. *J Bone Joint Surg Am*. 2009 Feb 1;91(Suppl 1):95–101.
13. Crook BS, Collins AT, Lad NK, Spritzer CE, Wittstein JR, DeFrate LE. Effect of walking on in vivo tibiofemoral cartilage strain in ACL-deficient versus intact knees. *J Biomech*. 2021 Feb 12;116:110210.
14. Torry MR, Decker MJ, Viola RW, O'Connor DD, Richard Steadman J. Intra-articular knee joint effusion induces quadriceps avoidance gait patterns. Presented at the XVII Congress of the International Society of Biomechanics, Calgares, Canada, 8–13 August 1999. *Clin Biomech*. 2000 Mar 1;15(3):147–59.
15. Pietrosimone B, Lepley AS, Murray AM, Thomas AC, Bahhur NO, Schwartz TA. Changes in voluntary quadriceps activation predict changes in muscle strength and gait biomechanics following knee joint effusion. *Clin Biomech*. 2014 Sep 1;29(8):923–9.

16. Seeley MK, Park J, King D, Hopkins JT. A Novel Experimental Knee-Pain Model Affects Perceived Pain and Movement Biomechanics. *J Athl Train*. 2013 May 1;48(3):337–45.
17. Pietrosimone B, Seeley MK, Johnston C, Pfeiffer SJ, Spang JT, Blackburn JT. Walking Ground Reaction Force Post-ACL Reconstruction: Analysis of Time and Symptoms. *Med Sci Sports Exerc*. 2019 Feb;51(2):246–54.
18. Luc-Harkey BA, Franz JR, Hackney AC, Blackburn JT, Padua DA, Pietrosimone B. Lesser lower extremity mechanical loading associates with a greater increase in serum cartilage oligomeric matrix protein following walking in individuals with anterior cruciate ligament reconstruction. *Clin Biomech*. 2018 Dec 1;60:13–9.
19. Pietrosimone B, Blackburn JT, Padua DA, Pfeiffer SJ, Davis HC, Luc-Harkey BA, et al. Walking gait asymmetries 6 months following anterior cruciate ligament reconstruction predict 12-month patient-reported outcomes. *J Orthop Res*. 2018;36(11):2932–40.
20. Pietrosimone B, Blackburn JT, Harkey MS, Luc BA, Hackney AC, Padua DA, et al. Greater Mechanical Loading During Walking Is Associated With Less Collagen Turnover in Individuals With Anterior Cruciate Ligament Reconstruction. *Am J Sports Med*. 2016 Feb 1;44(2):425–32.
21. Gard SA, Miff SC, Kuo AD. Comparison of kinematic and kinetic methods for computing the vertical motion of the body center of mass during walking. *Hum Mov Sci*. 2004 Apr 1;22(6):597–610.
22. Veras L, Diniz-Sousa F, Boppre G, Resende-Coelho A, Moutinho-Ribeiro E, Devezas V, et al. Mechanical loading prediction through accelerometry data during walking and running. *Eur J Sport Sci*. 2022 Jul 15;0(0):1–10.
23. Alcantara RS, Edwards WB, Millet GY, Grabowski AM. Predicting continuous ground reaction forces from accelerometers during uphill and downhill running: a recurrent neural network solution [PeerJ]. *PeerJ*. 10:e12752.
24. Jiang X, Napier C, Hannigan B, Eng JJ, Menon C. Estimating Vertical Ground Reaction Force during Walking Using a Single Inertial Sensor. *Sensors*. 2020 Jan;20(15):4345.
25. Bach MM, Dominici N, Daffertshofer A. Predicting vertical ground reaction forces from 3D accelerometry using reservoir computers leads to accurate gait event detection [Internet]. *bioRxiv*; 2022 [cited 2022 Feb 21]. p. 2022.02.14.480318. Available from: <https://www.biorxiv.org/content/10.1101/2022.02.14.480318v1>
26. Evans-Pickett A, Davis-Wilson HC, Luc-Harkey BA, Blackburn JT, Franz JR, Padua DA, et al. Biomechanical effects of manipulating peak vertical ground reaction force throughout gait in individuals 6–12 months after anterior cruciate ligament reconstruction. *Clin Biomech*. 2020 Jun 1;76:105014.
27. Pedregosa F, Varoquaux G, Gramfort A, Michel V, Thirion B, Grisel O, et al. Scikit-learn: Machine Learning in Python. *J Mach Learn Res*. 2011;12(85):2825–30.
28. Ribeiro MT, Singh S, Guestrin C. “Why Should I Trust You?”: Explaining the Predictions of Any Classifier [Internet]. *arXiv*; 2016 [cited 2023 Apr 21]. Available from: <http://arxiv.org/abs/1602.04938>

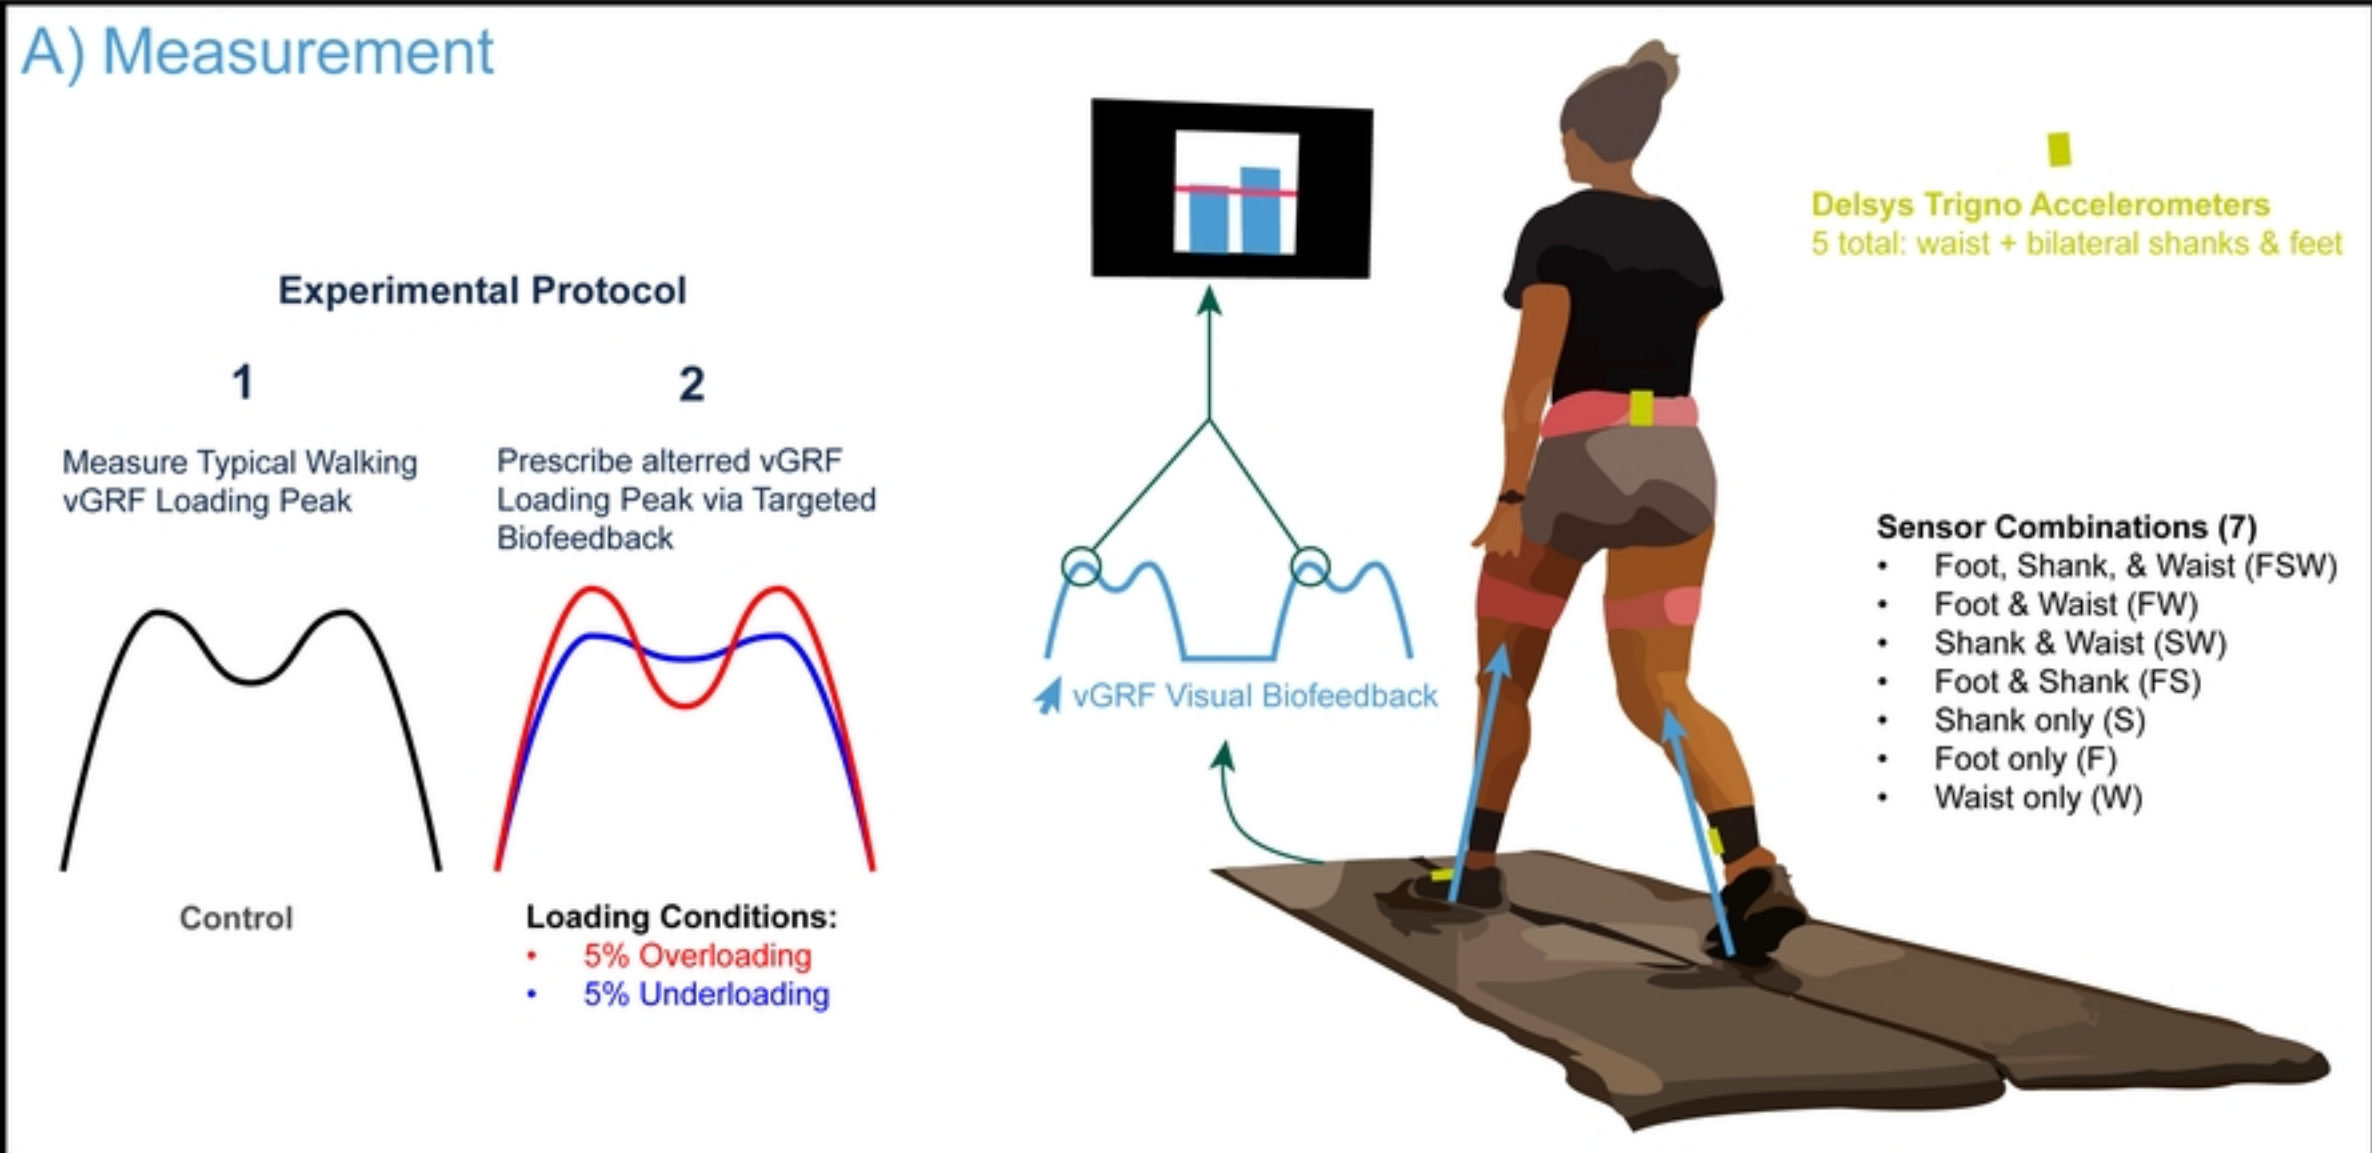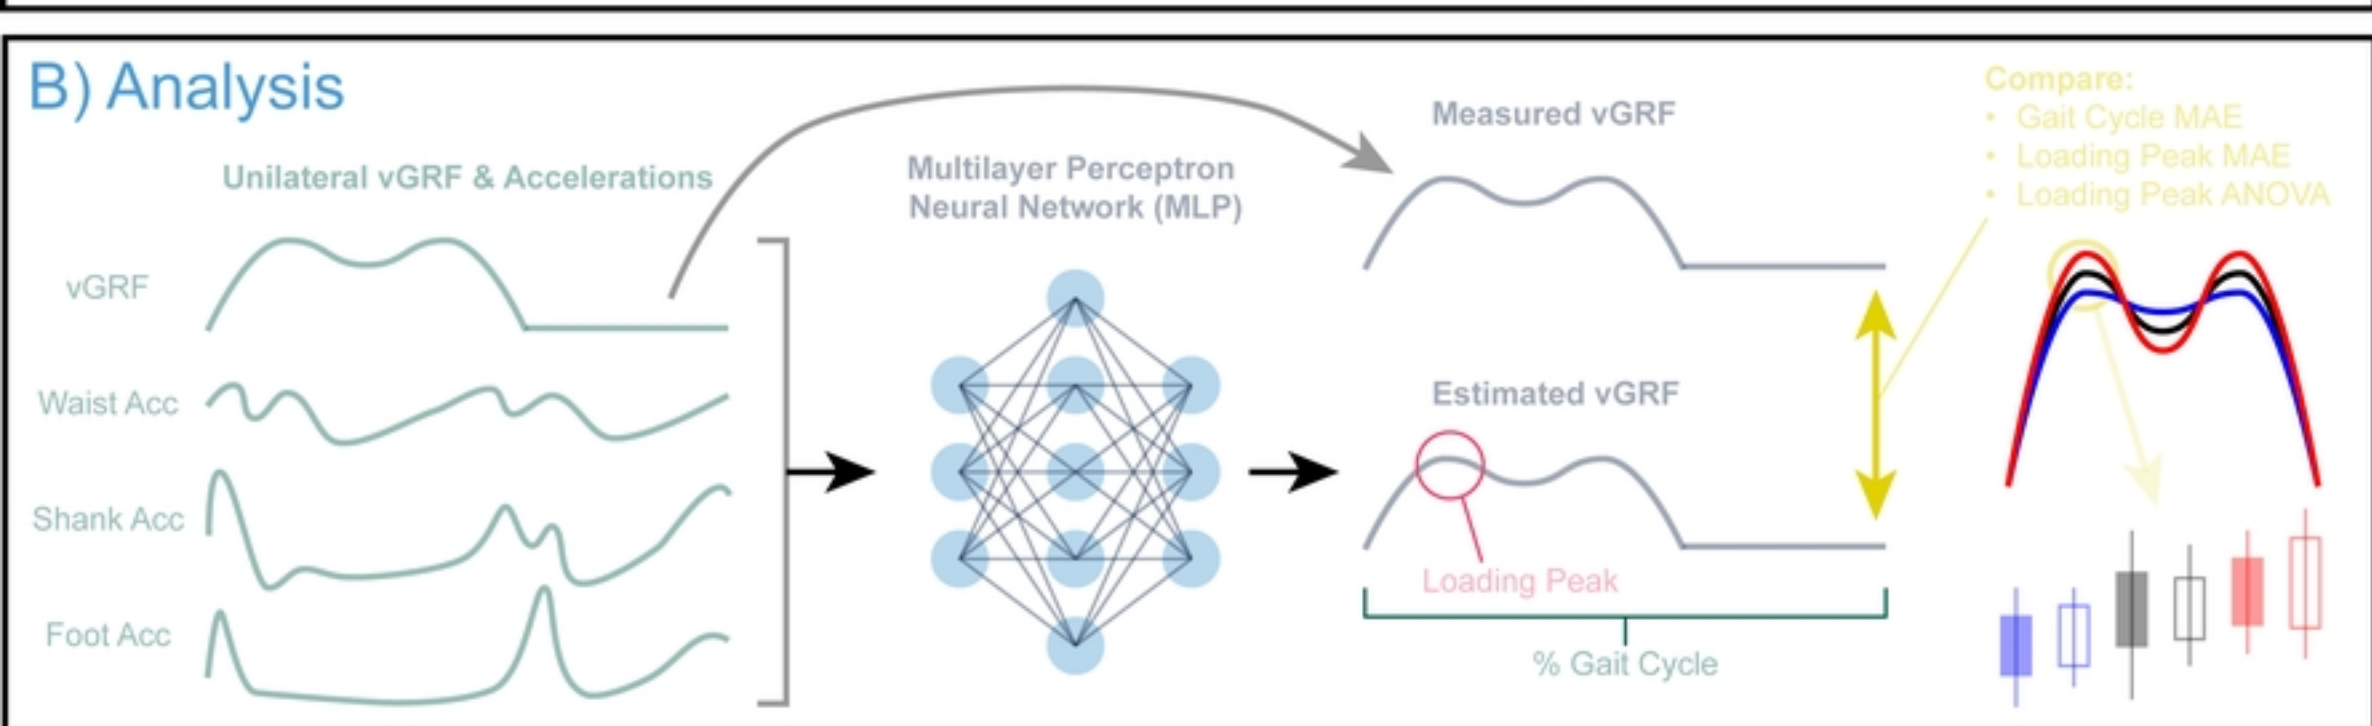

Figure 1

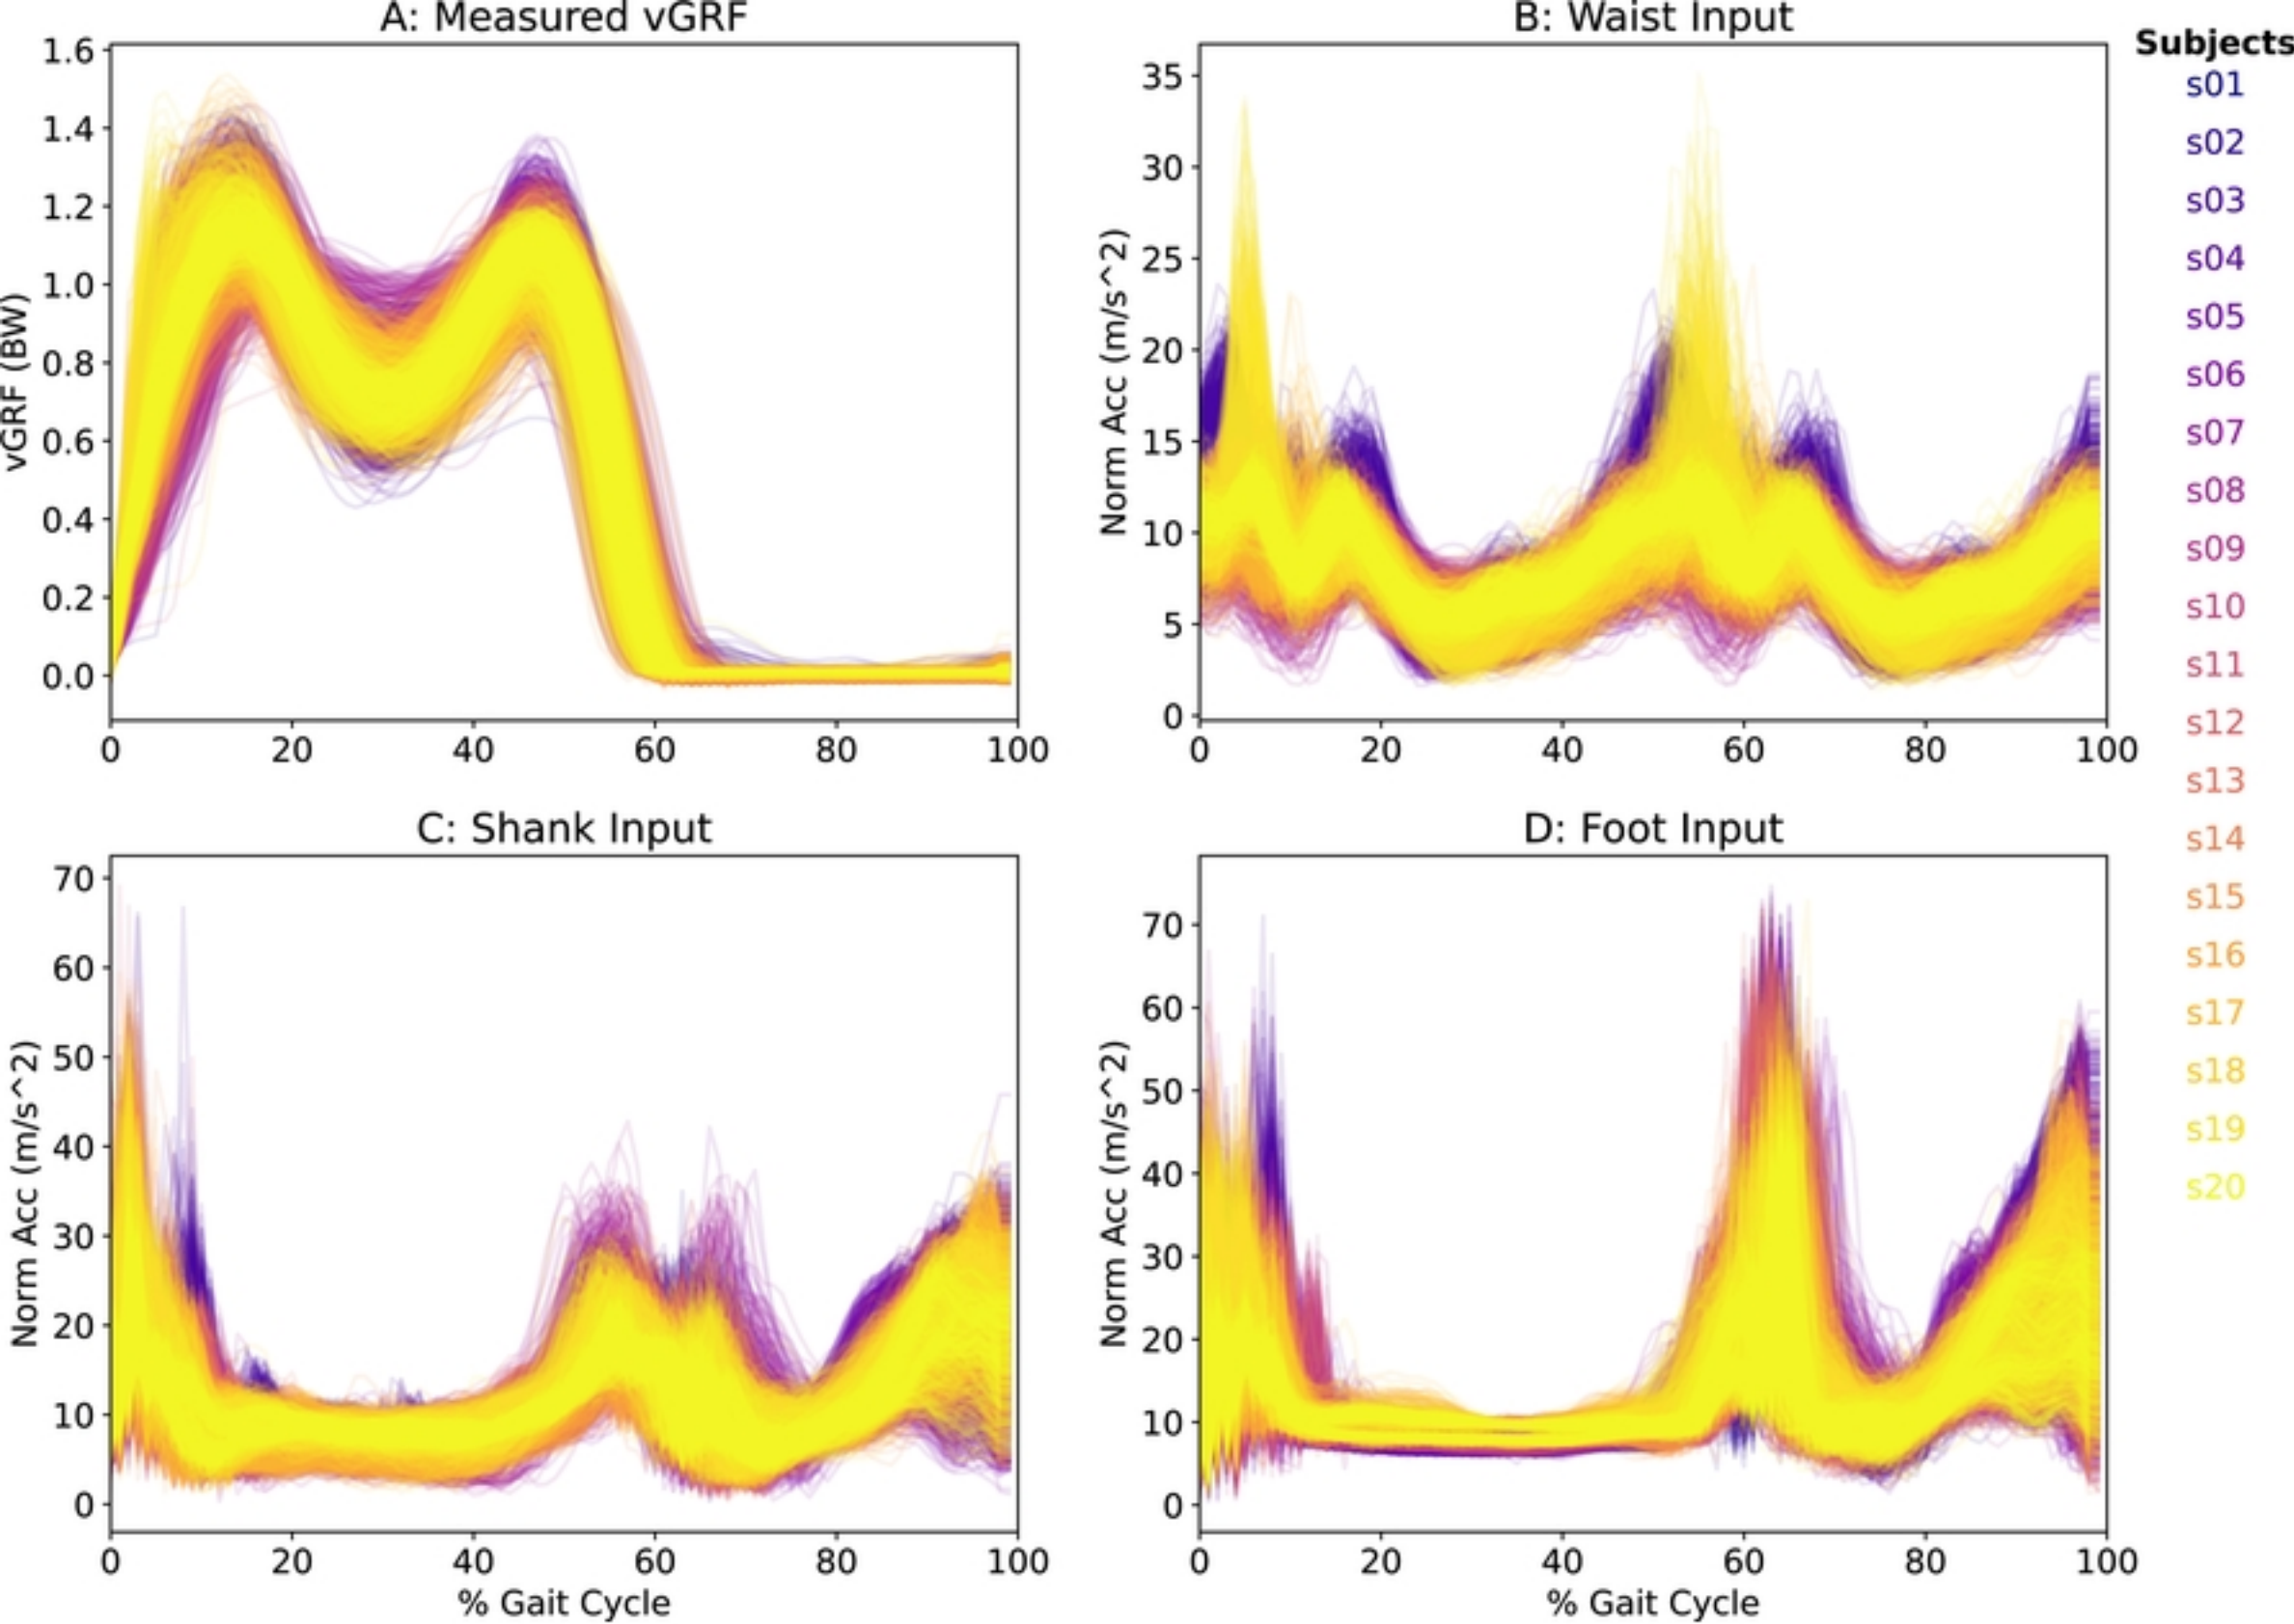

Figure 2

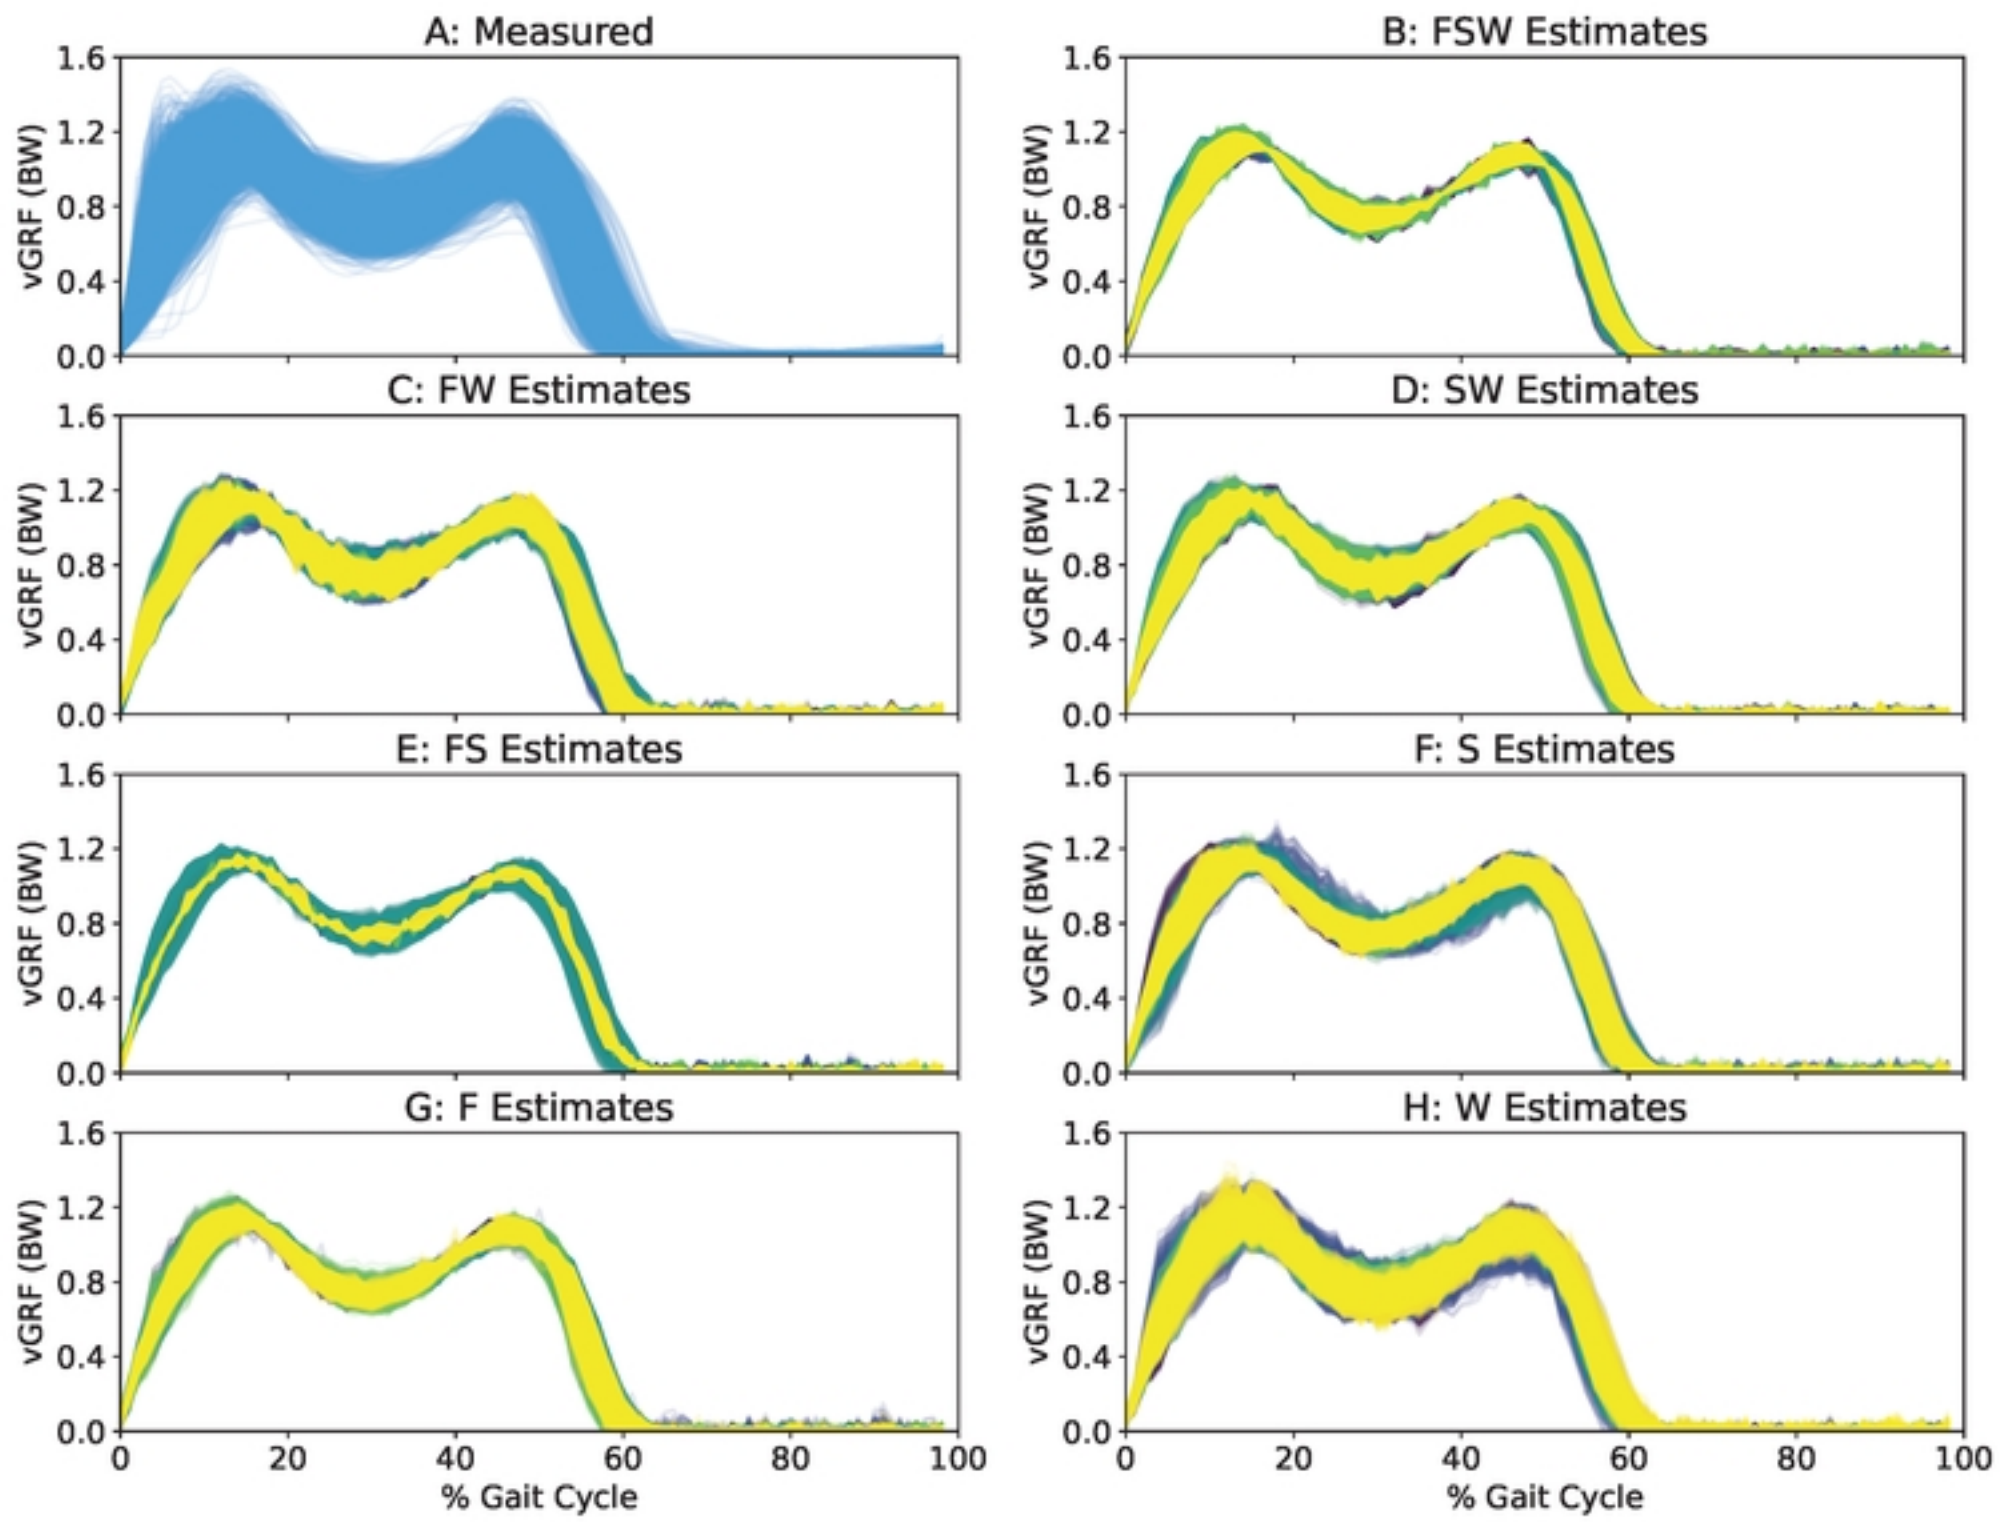

Figure 3



# A: Gait Cycle MAE

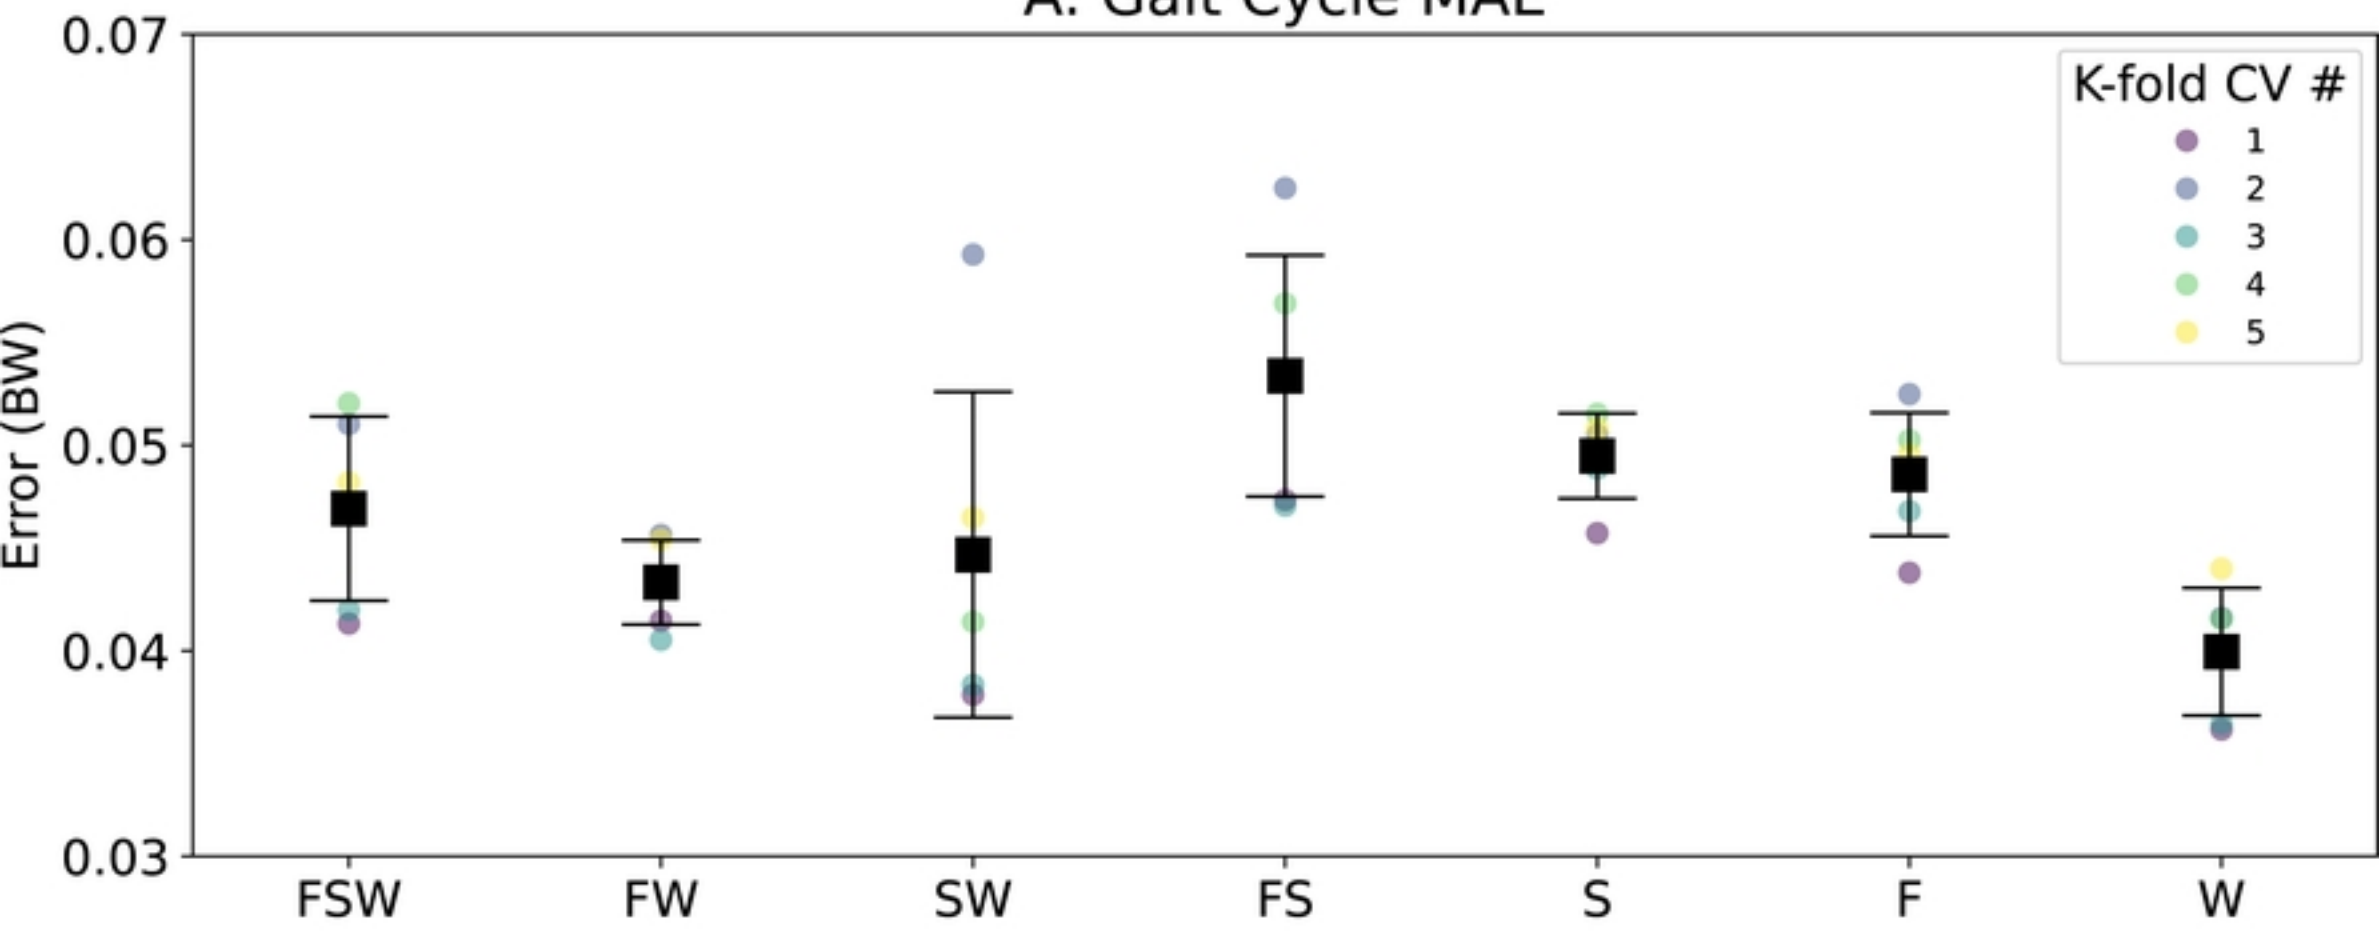

# B: Loading Peak MAE

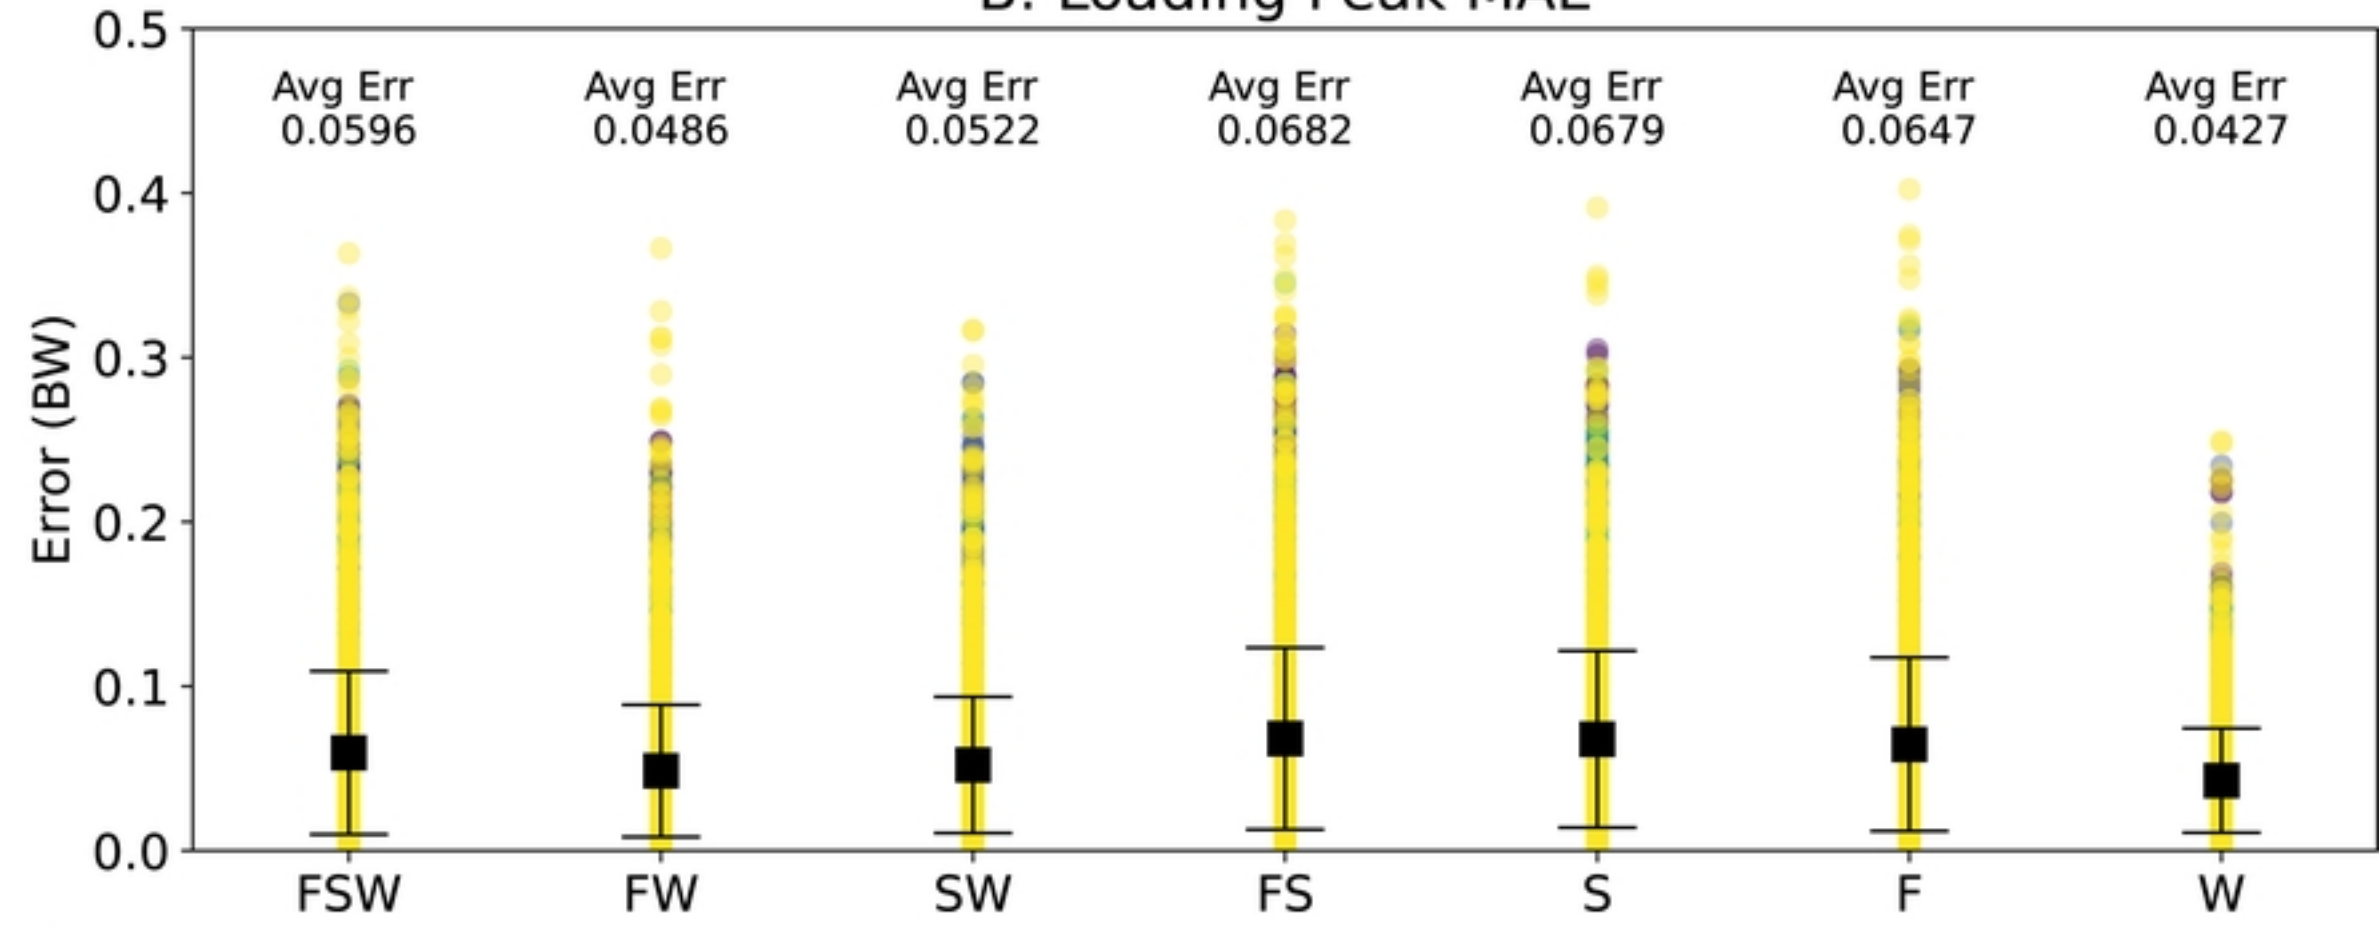

Figure 4

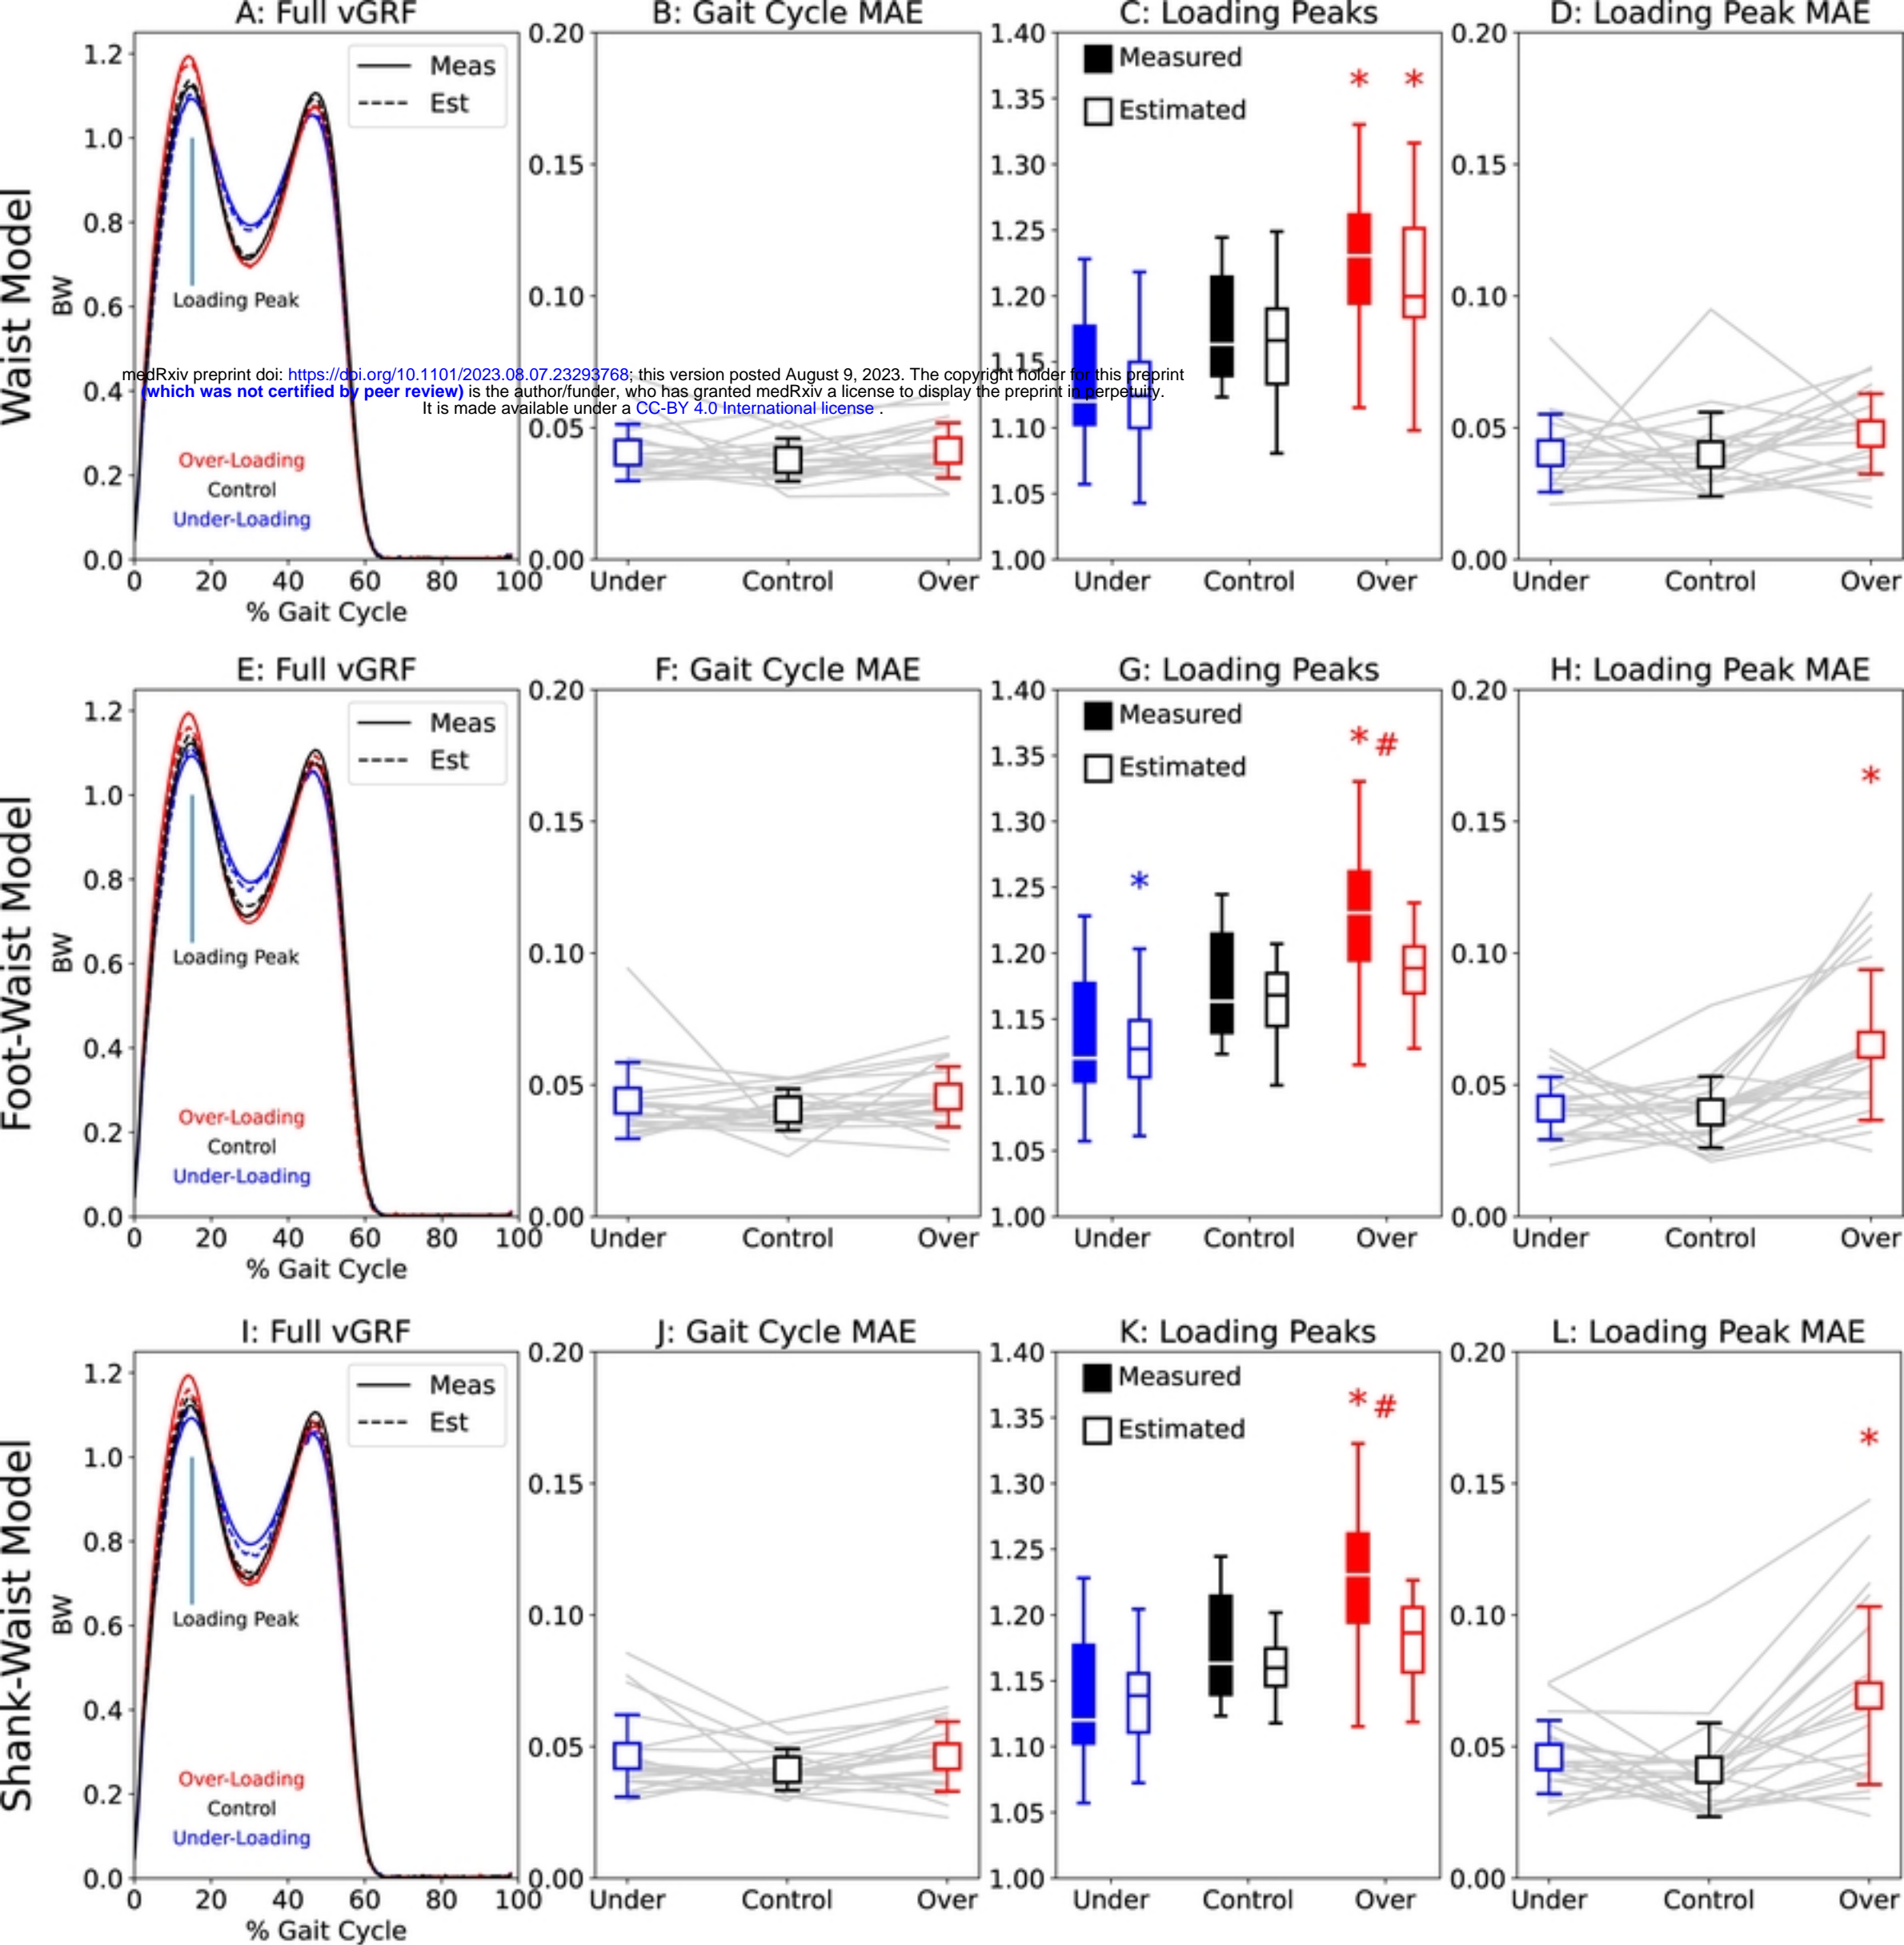

Figure 5

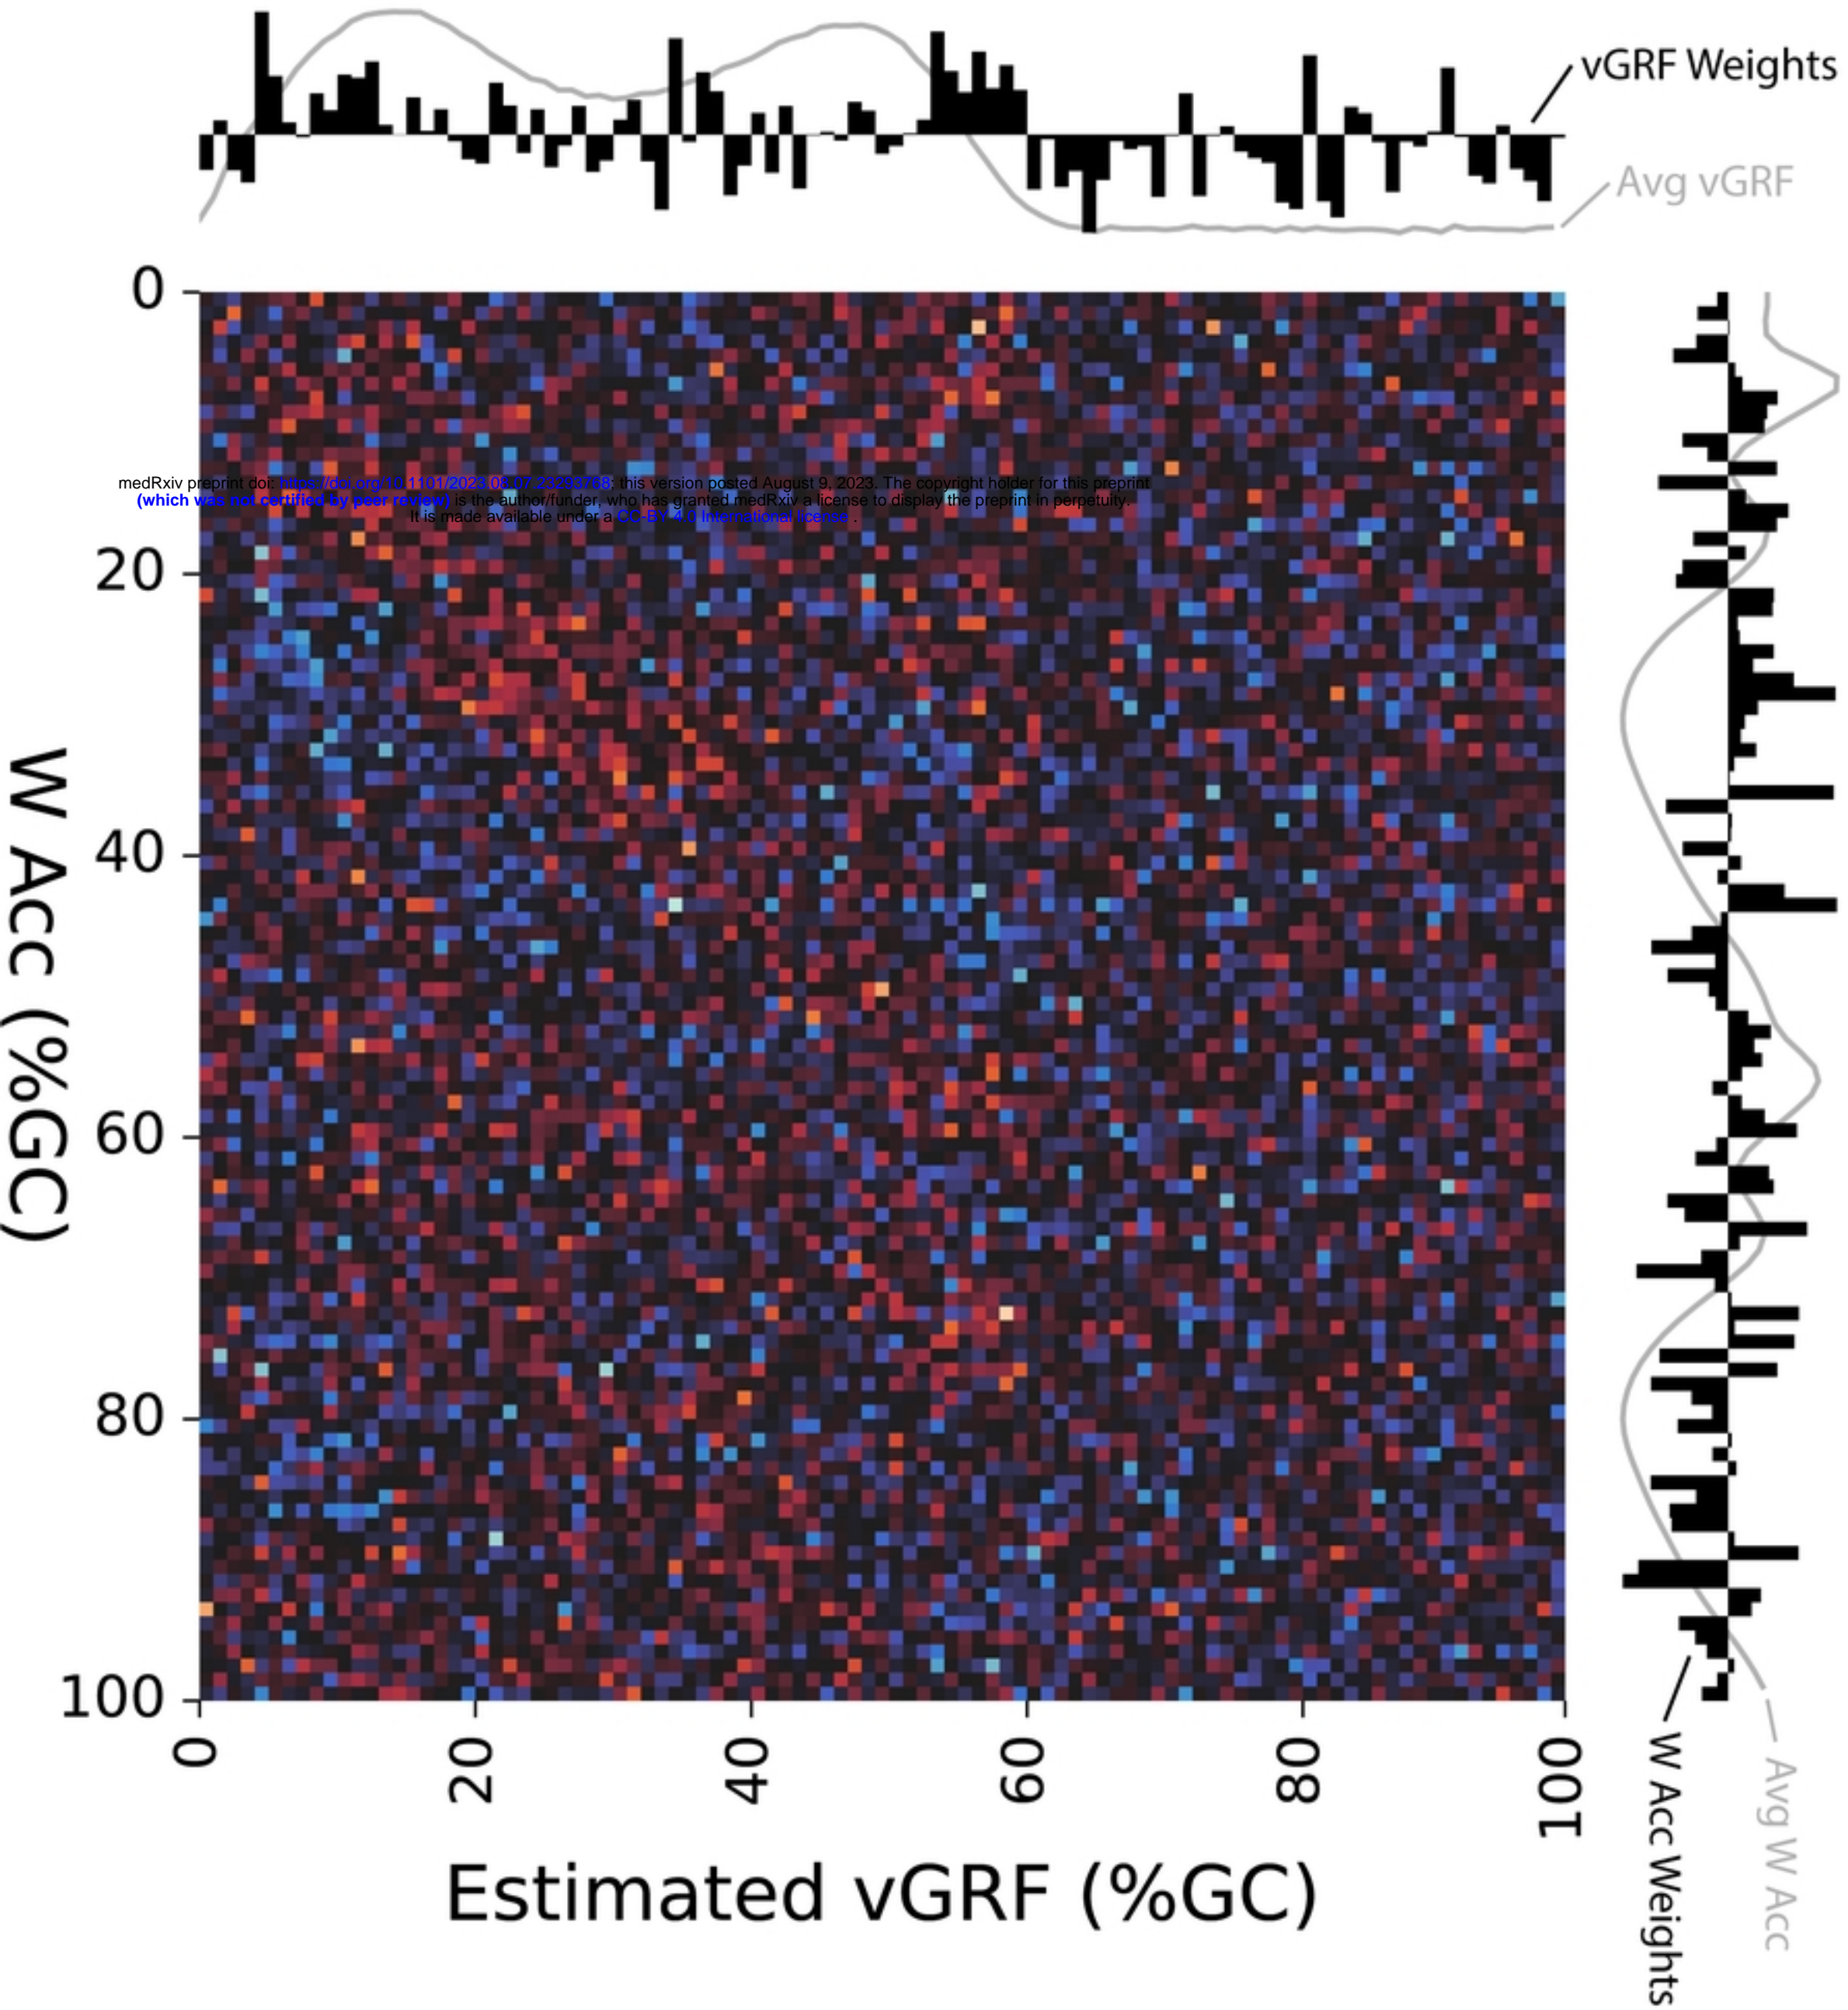

Figure 6
